# Supplementary material for: Epigenetics and transcription regulation during eukaryotic diversification: the saga of TFIID
Source: PubMed Central journal article supplement — Genes Dev. 2019 Aug 1;33(15-16):888–902. doi: 10.1101/gad.300475.117 (PMC6672047; doi:10.1101/gad.300475.117), 2019-08-01
Supplement: supp_gad.300475.117_Supplemental_Fig_S2_to_S15.pdf [file supp_gad.300475.117_Supplemental_Fig_S2_to_S15.pdf]

Tree scale: 0.1

### Domains

- DUF3591
- ◆ Bromodomain
- ◆ TBP-binding
- Zf-CCHC\_6
- ◀ Ubiquitin

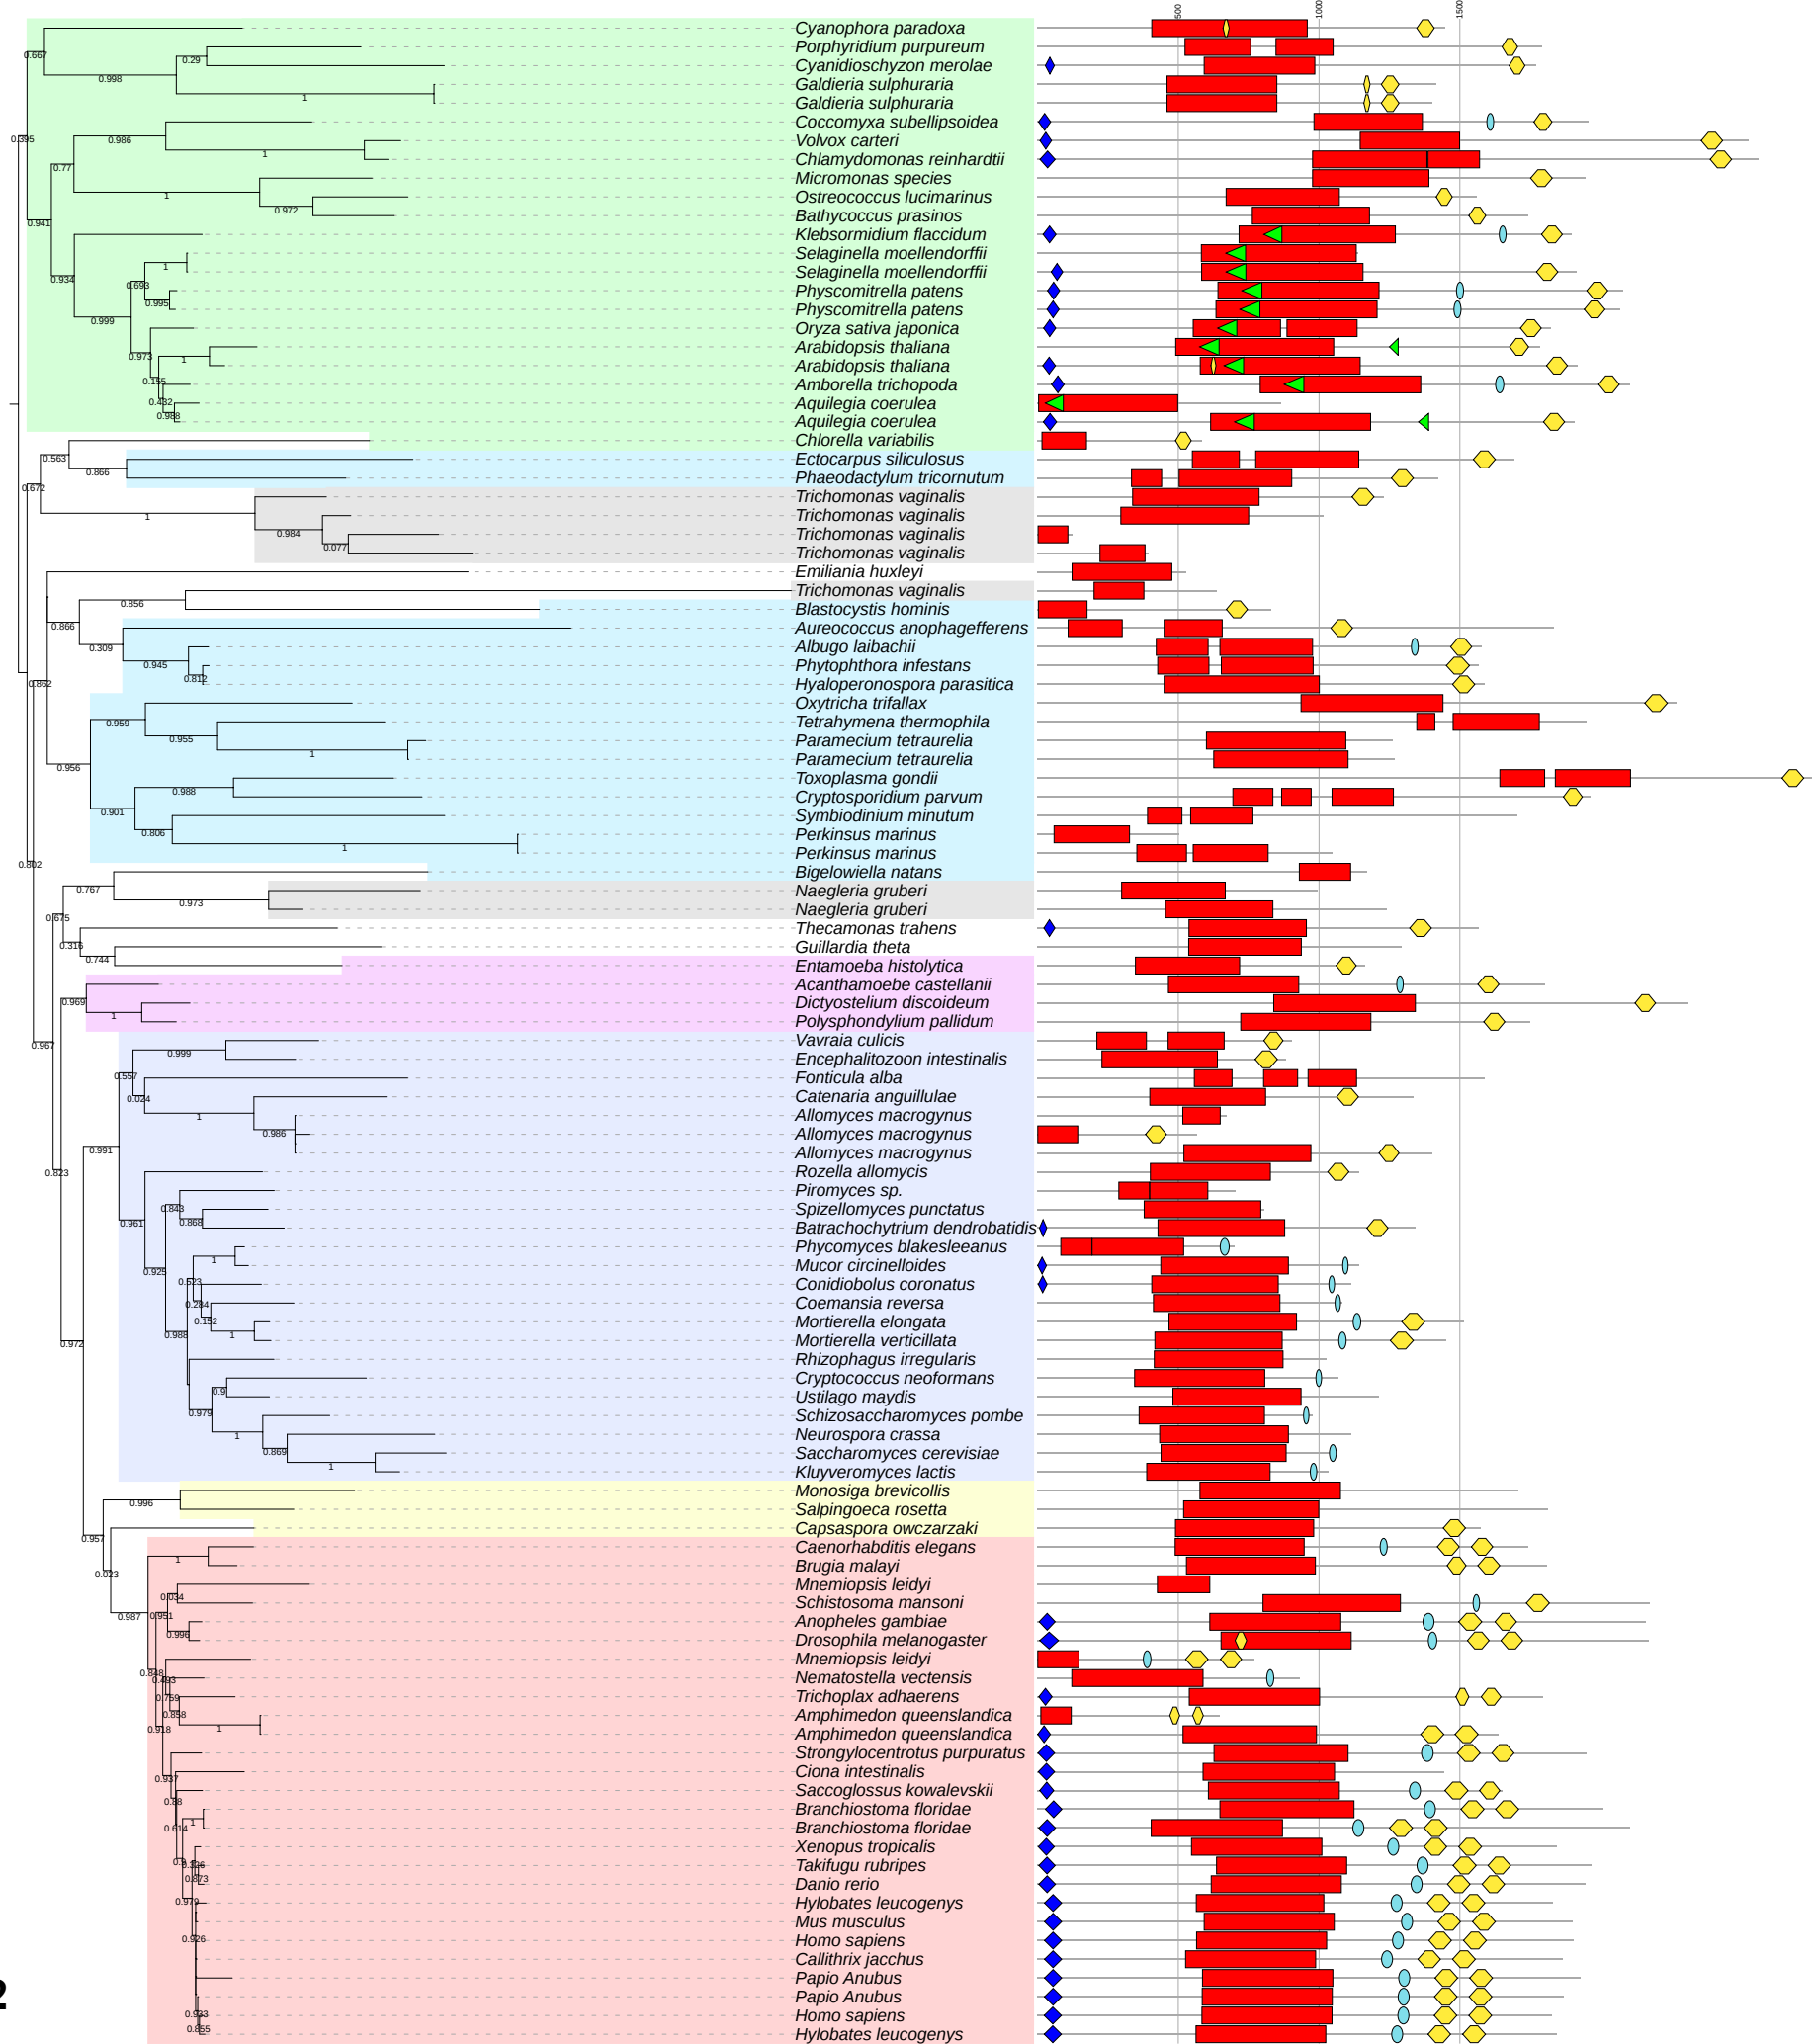

**Domains**

- Peptidase M1-like
- ◆ Bromodomain
- HEAT 2-like

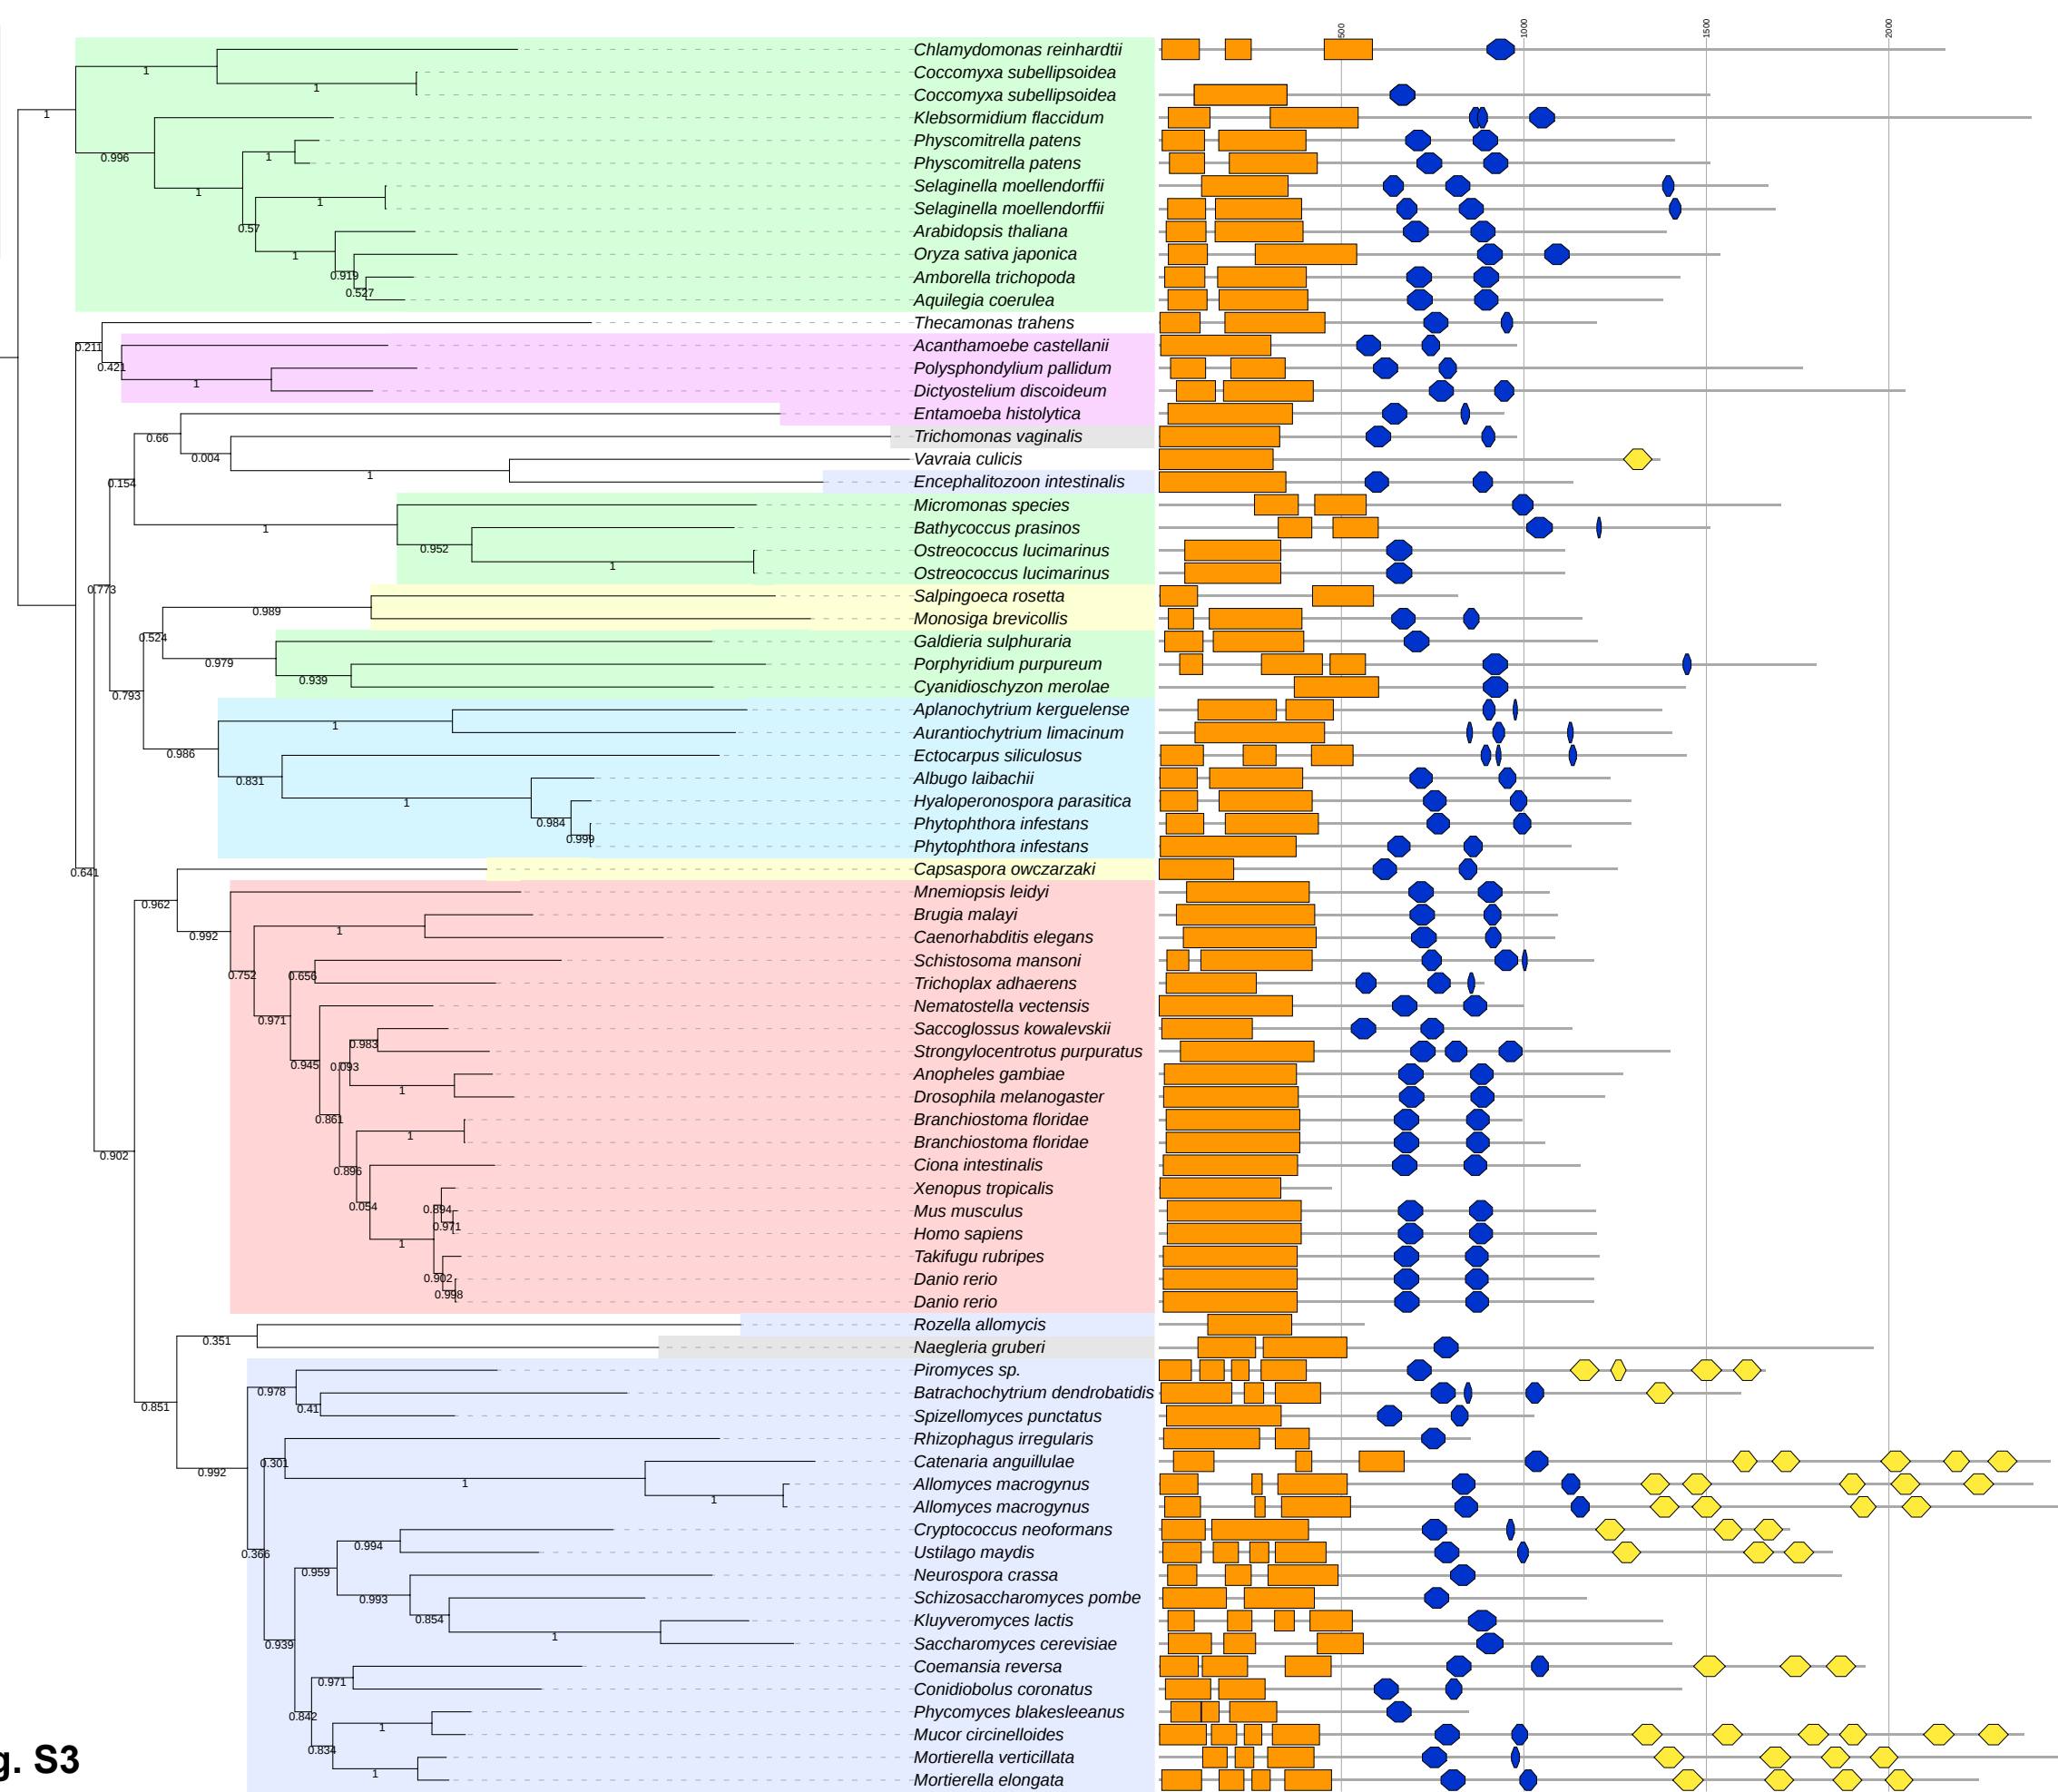

Supplemental Fig. S3

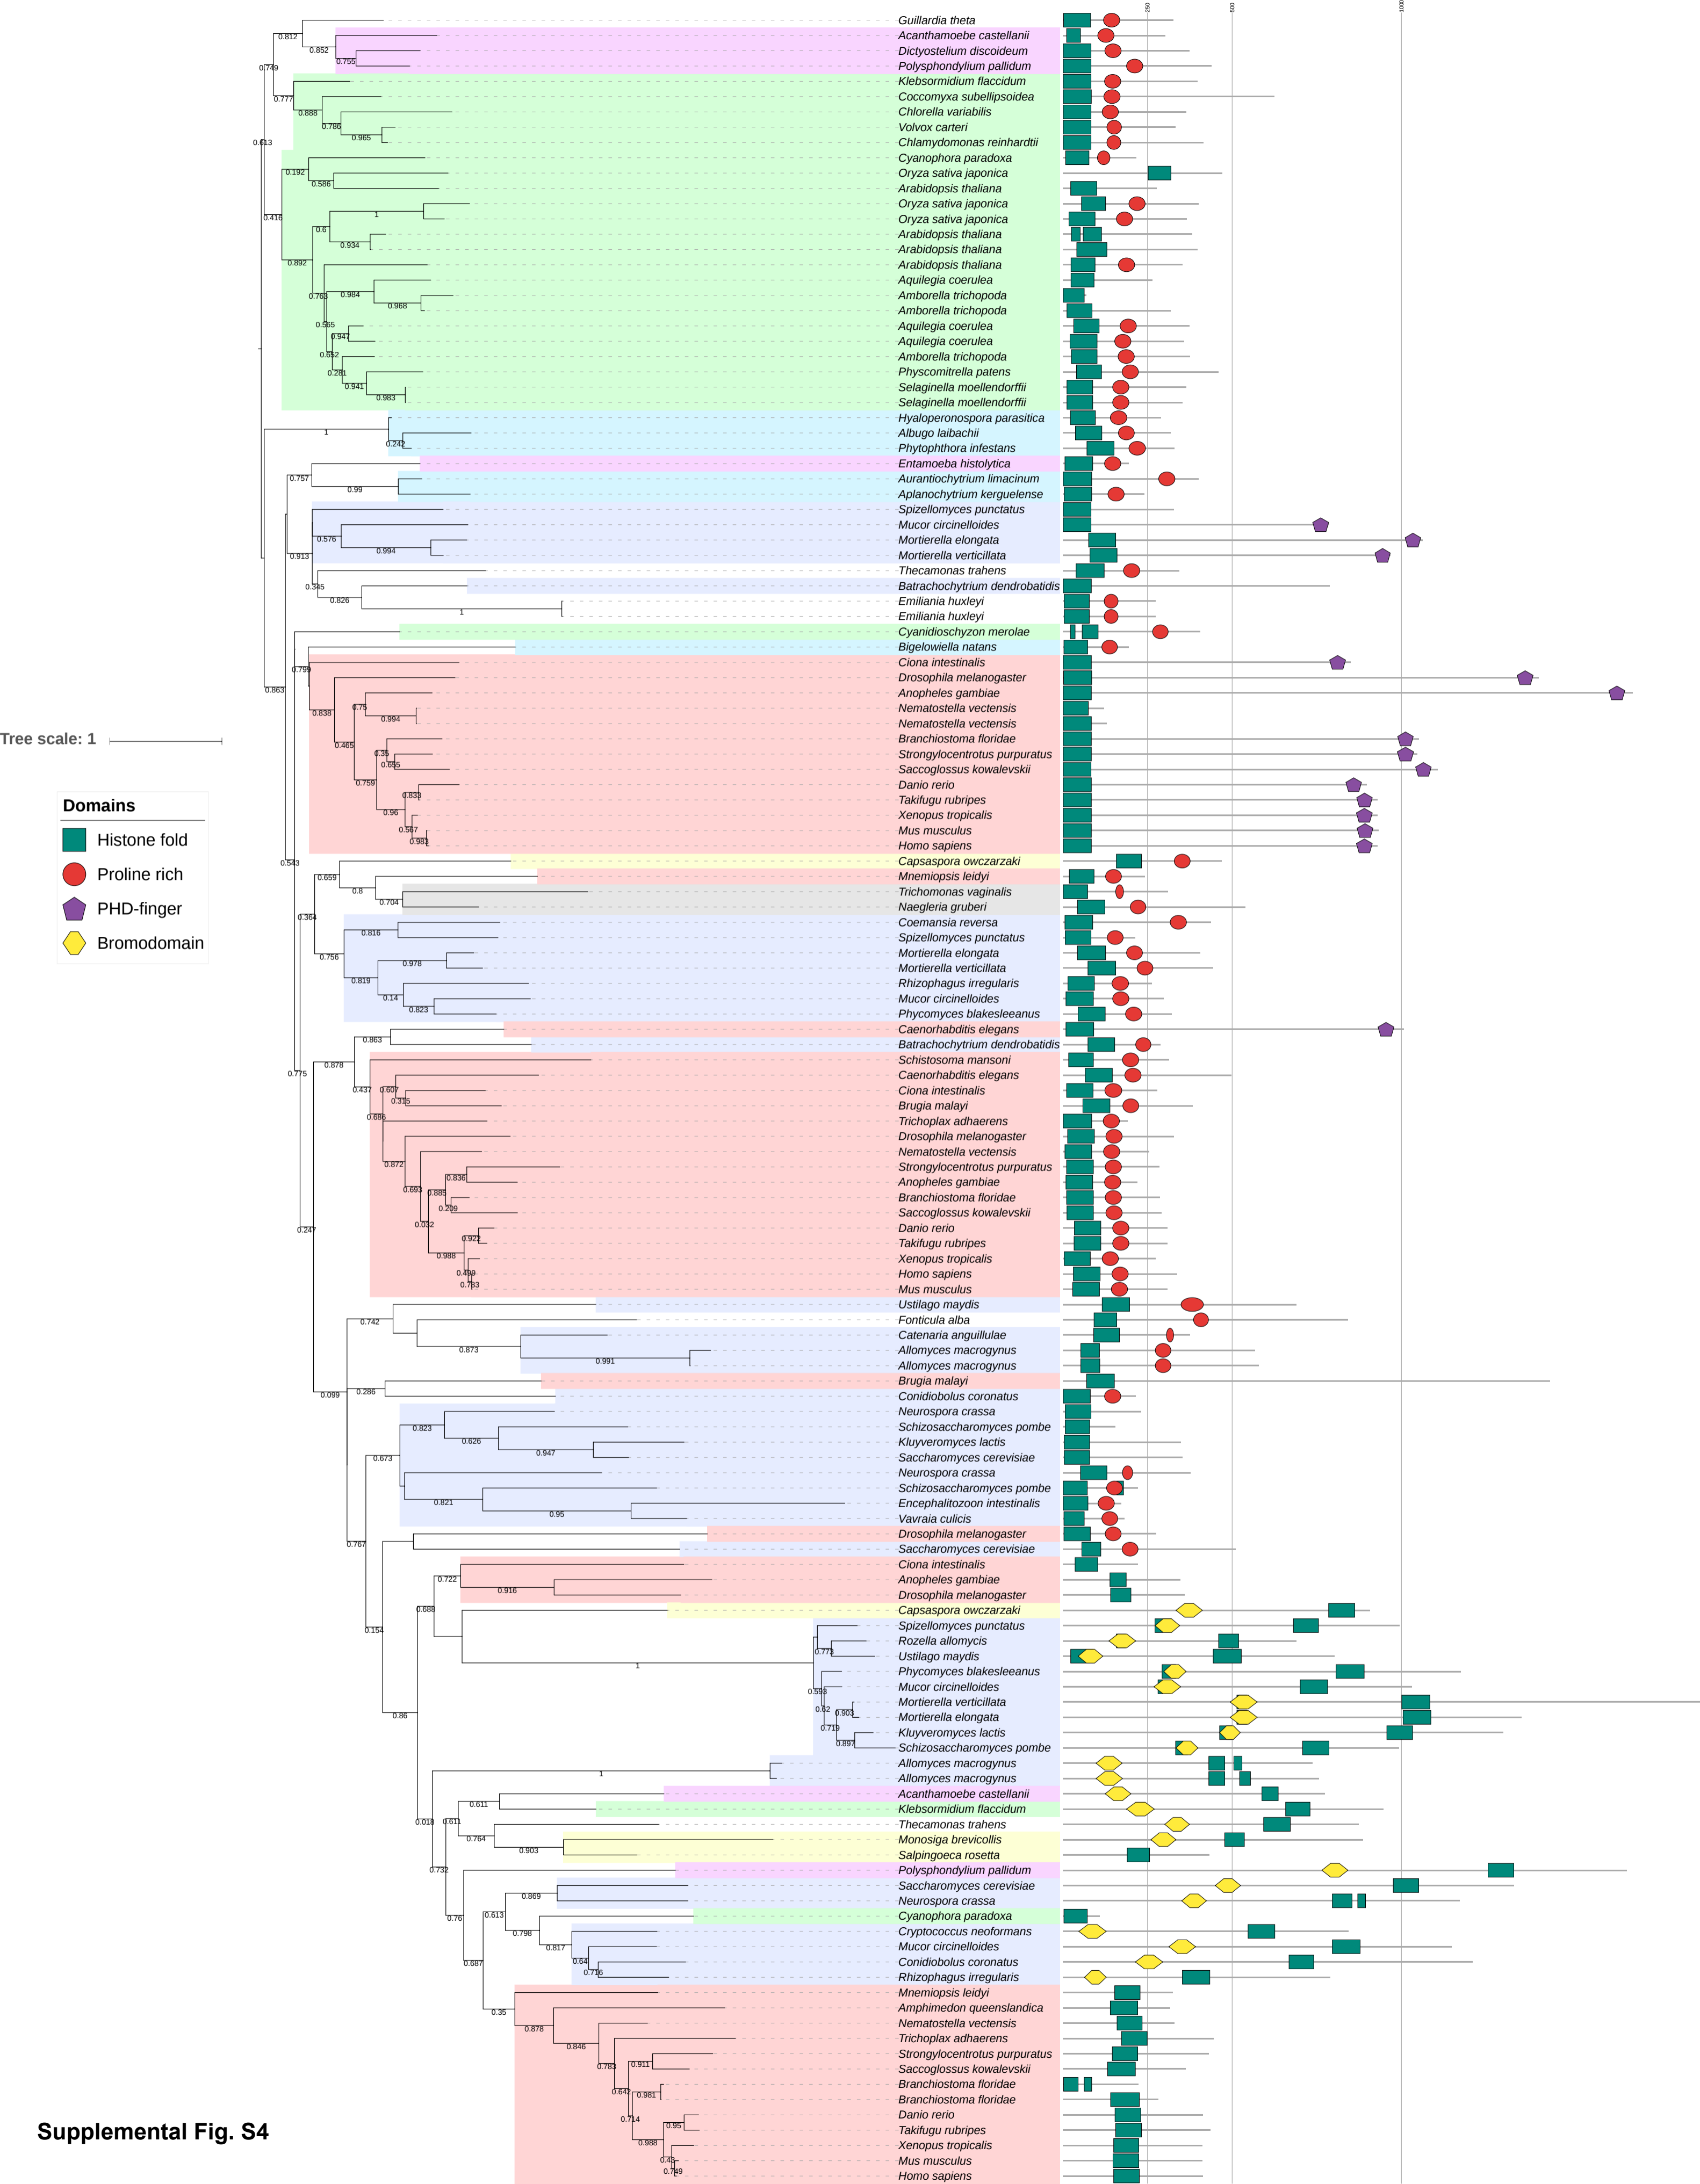

Supplemental Fig. S4

Tree scale: 1

### Domains

-  TAF5 NTD2
-  Lis Homology
-  WD40
-  WD40

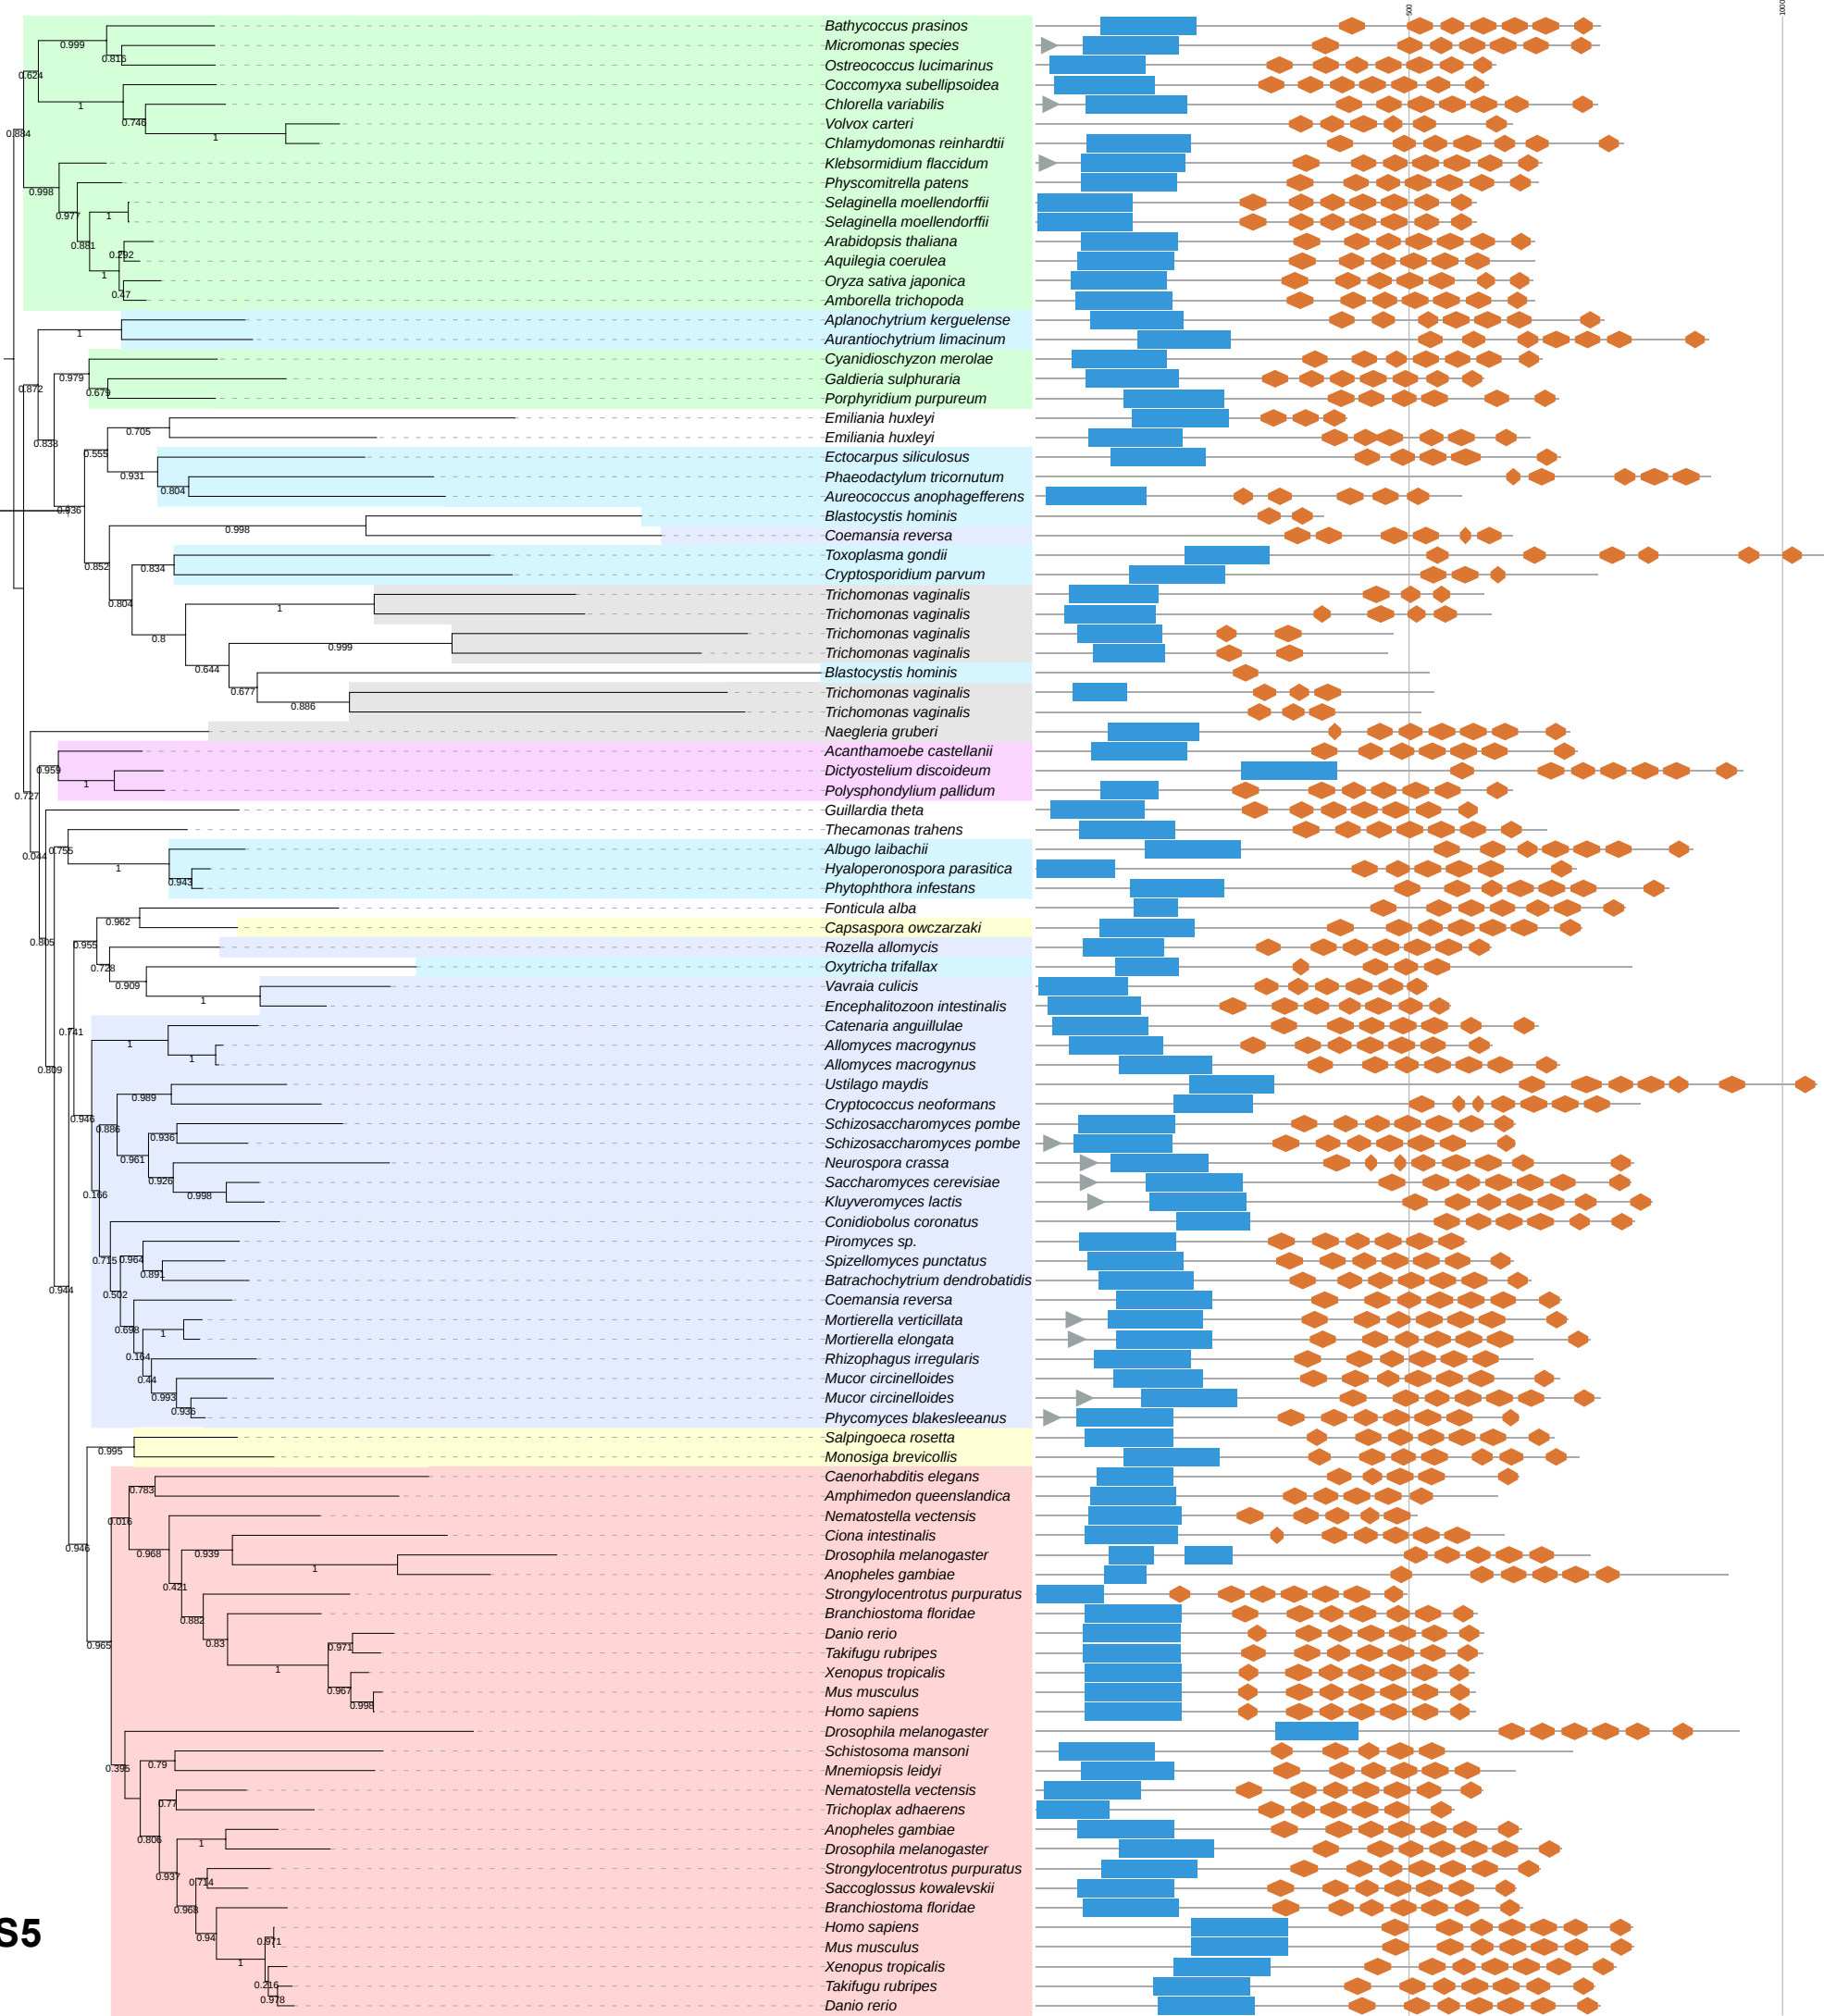

Supplemental Fig. S5

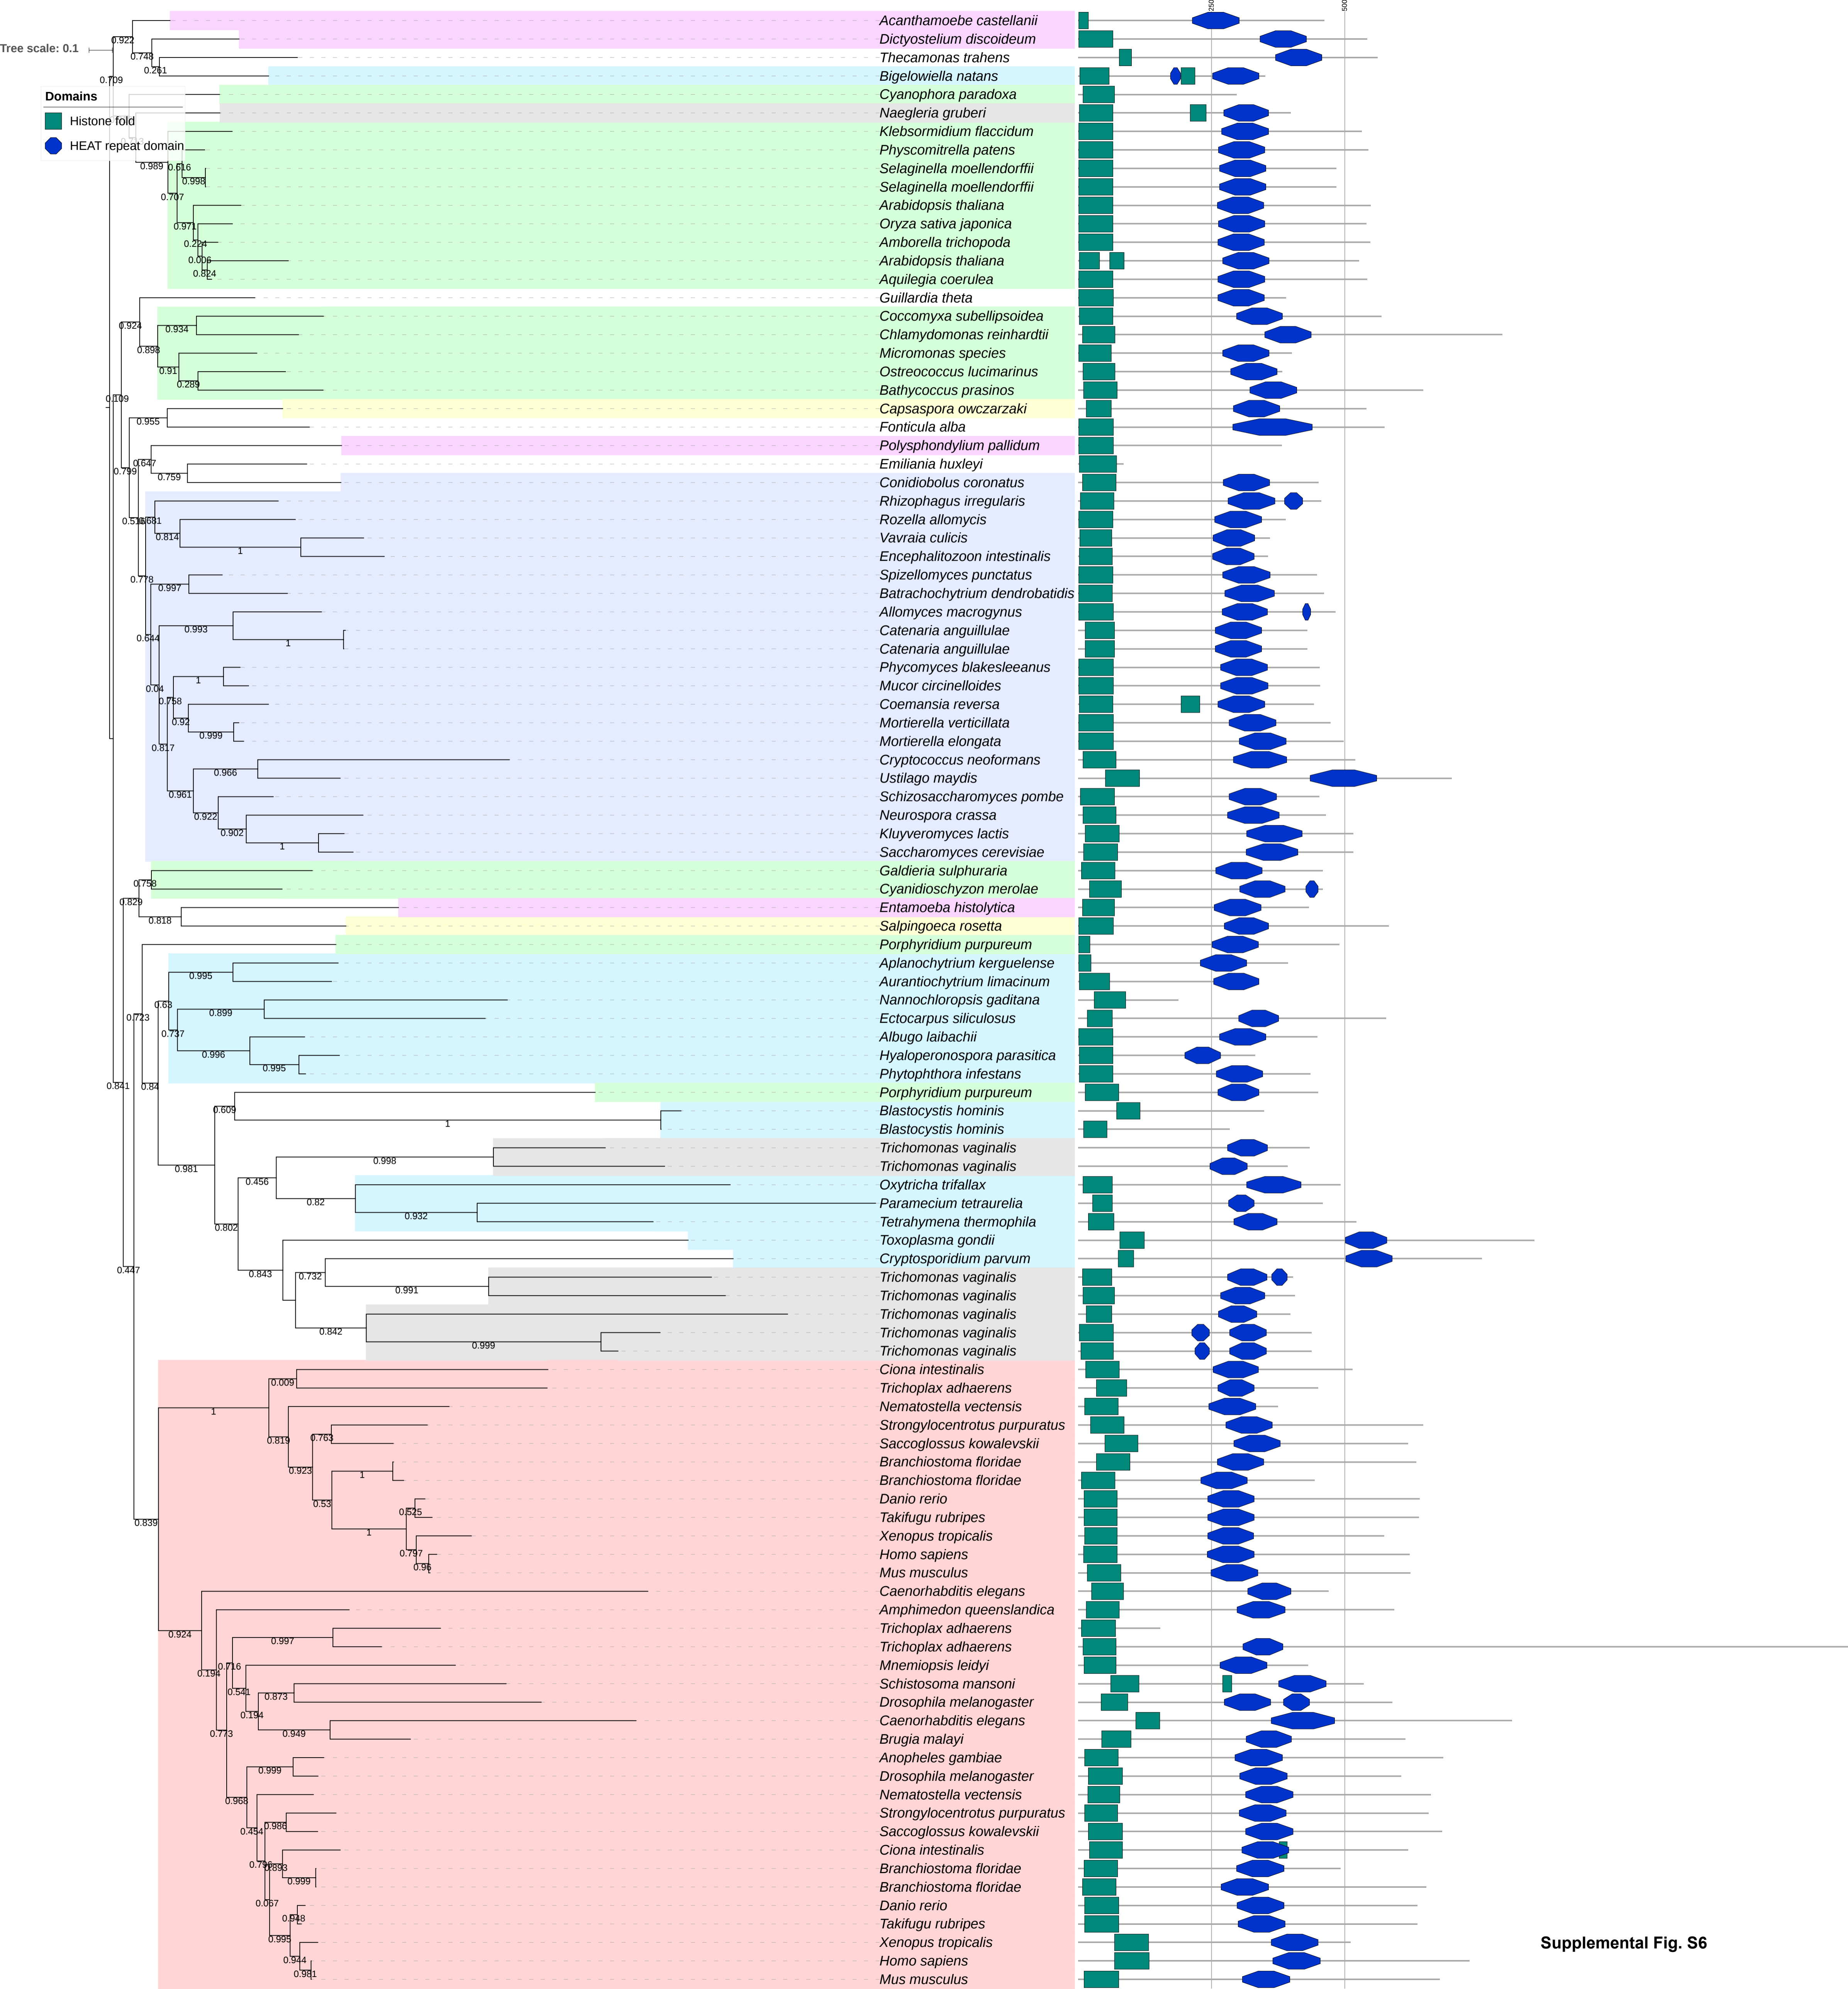

Tree scale: 0.1

### Domains

 Histone fold

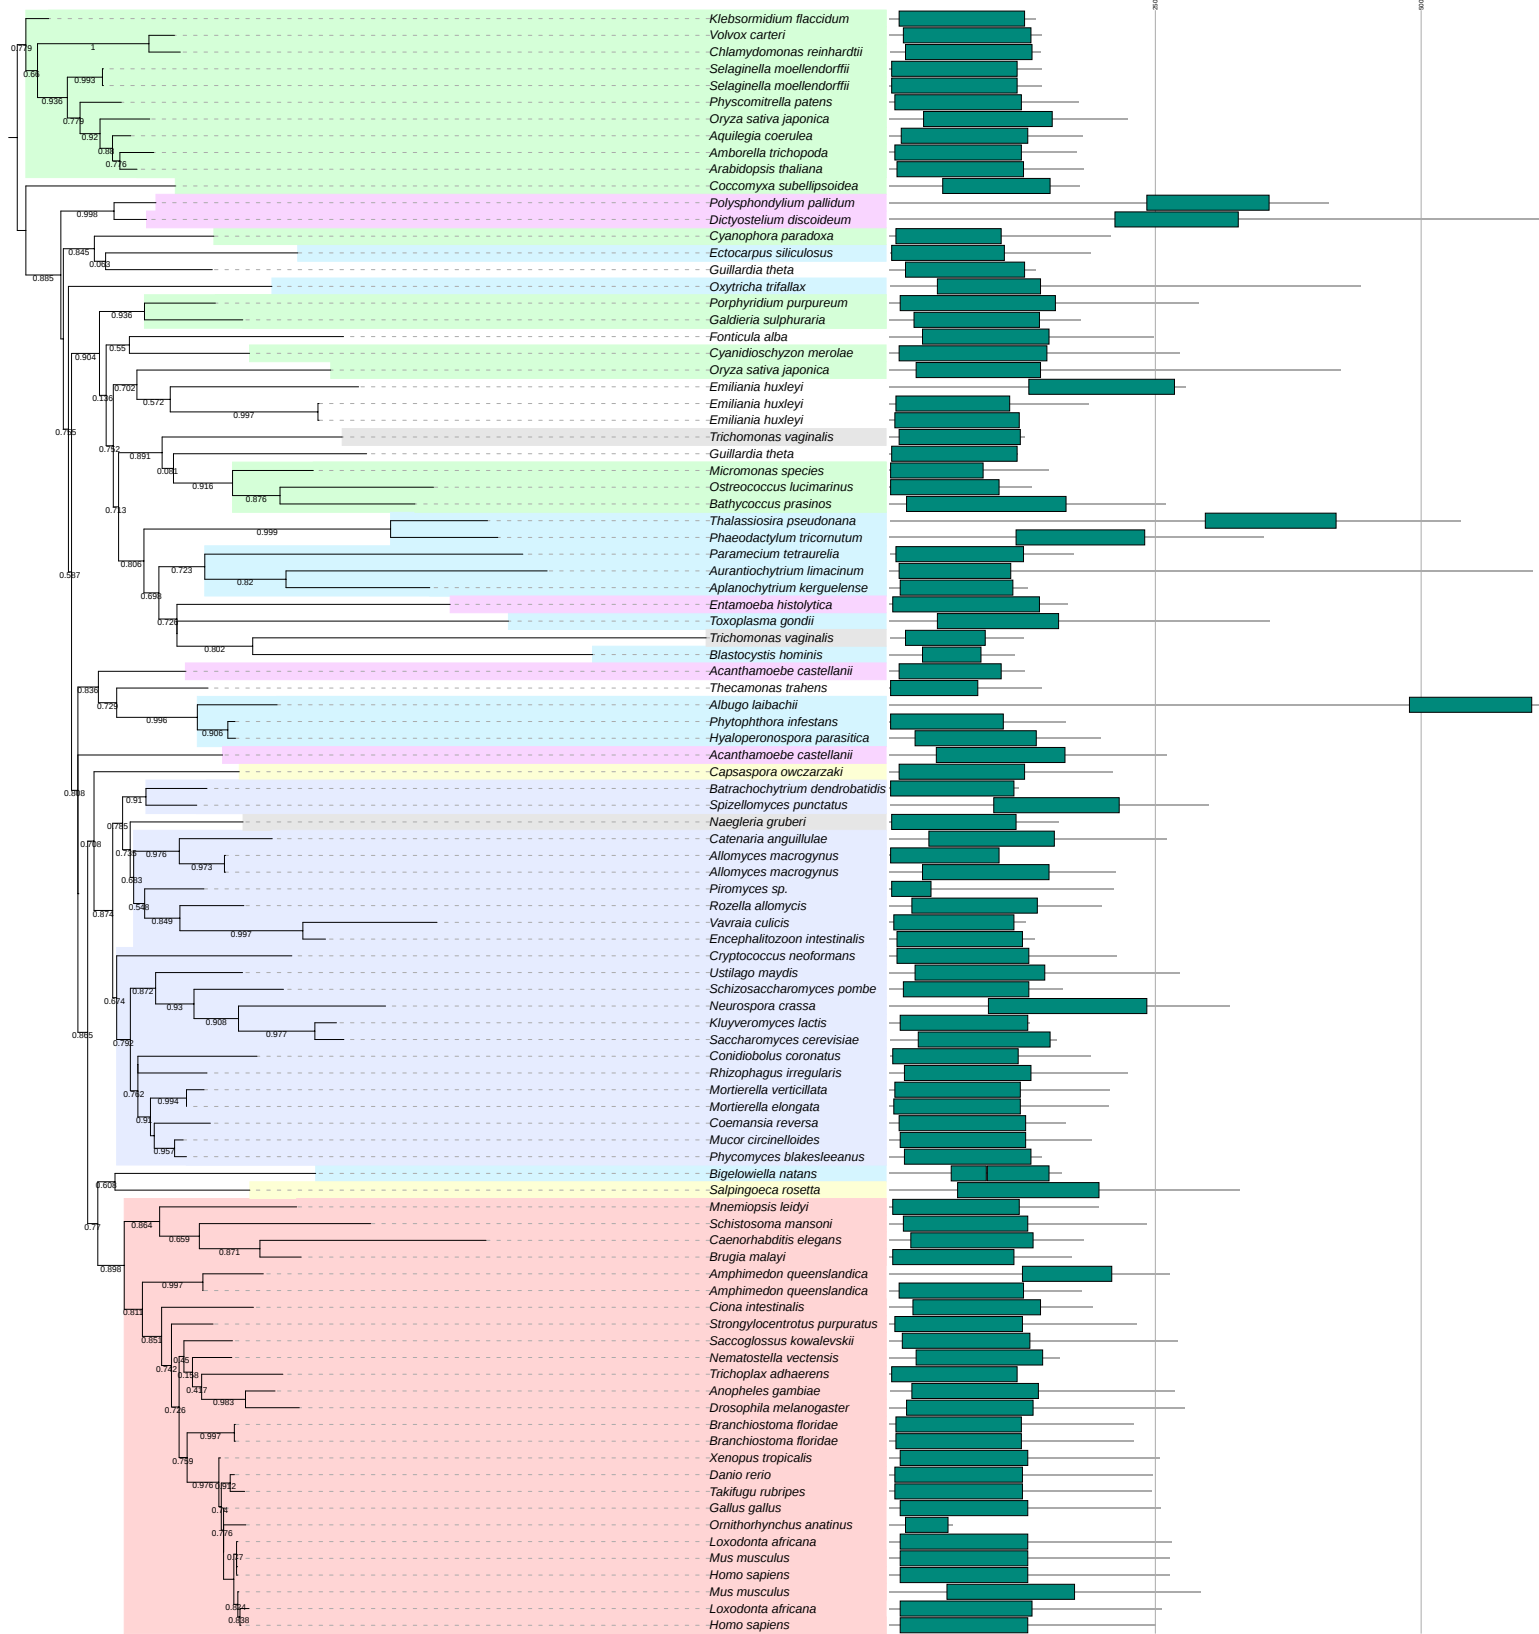

Supplemental Fig. S7

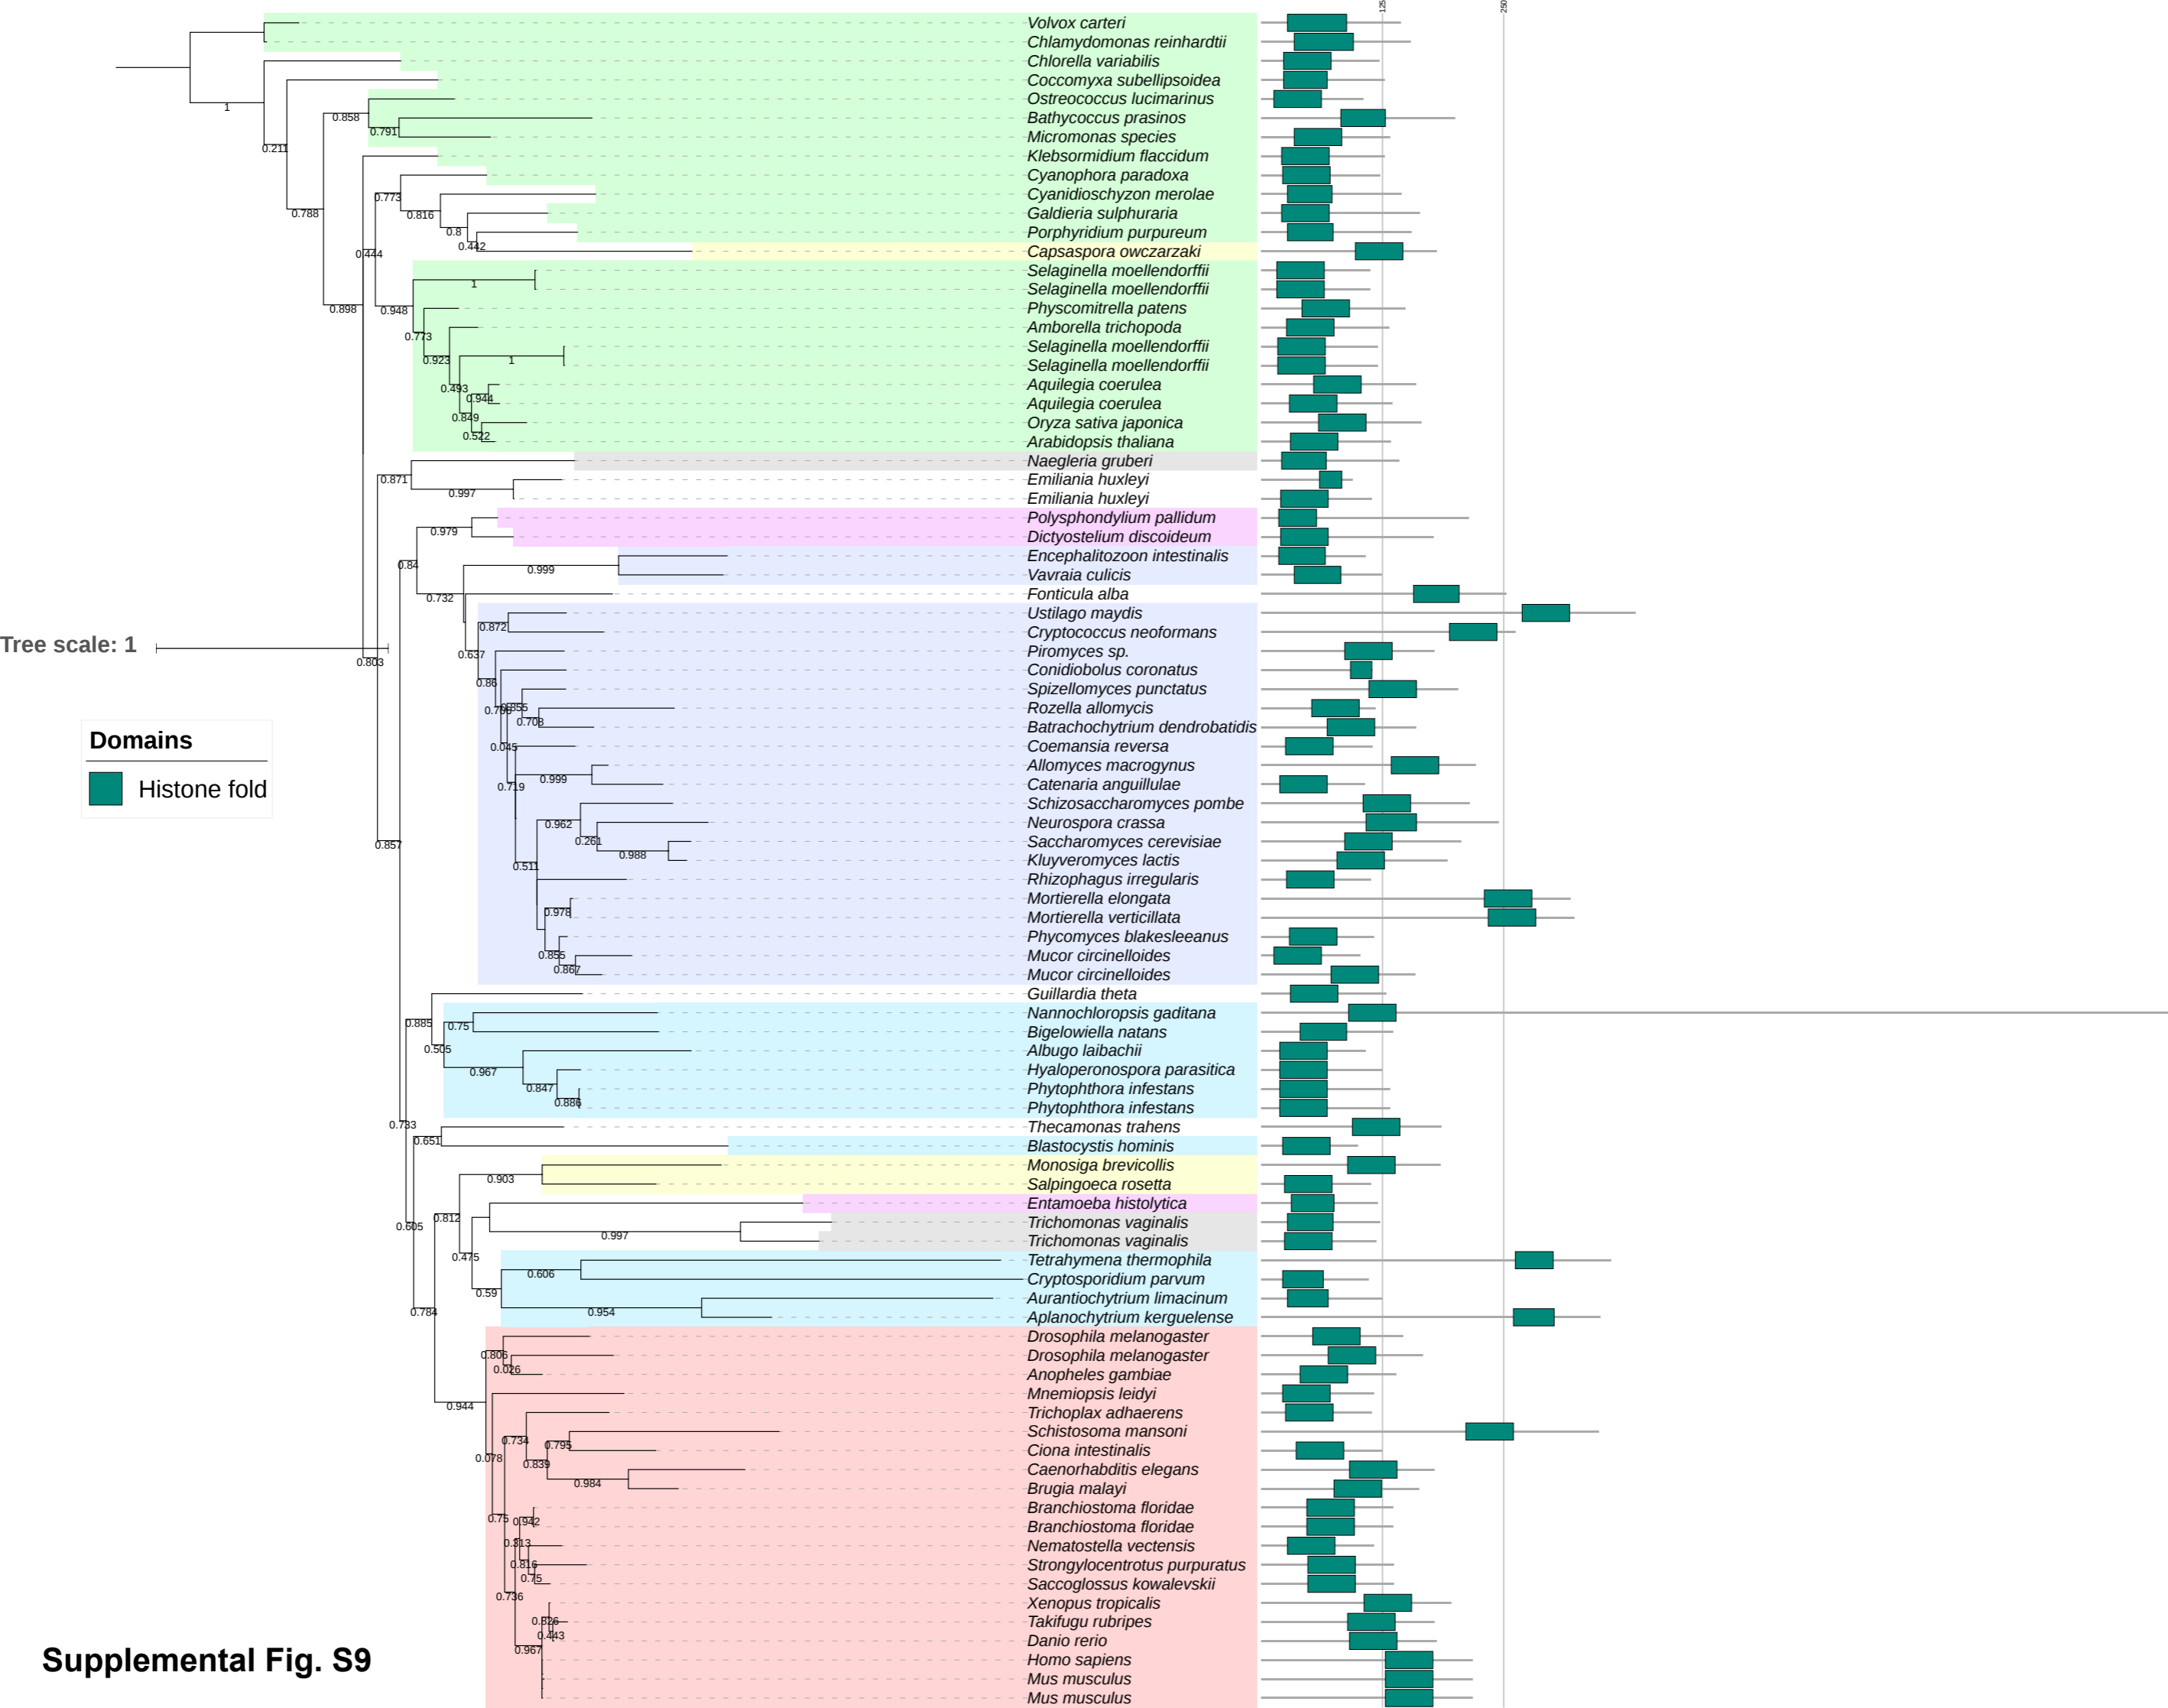

Tree scale: 0.1

**Domains**  
■ TAF7 N-terminal Domain

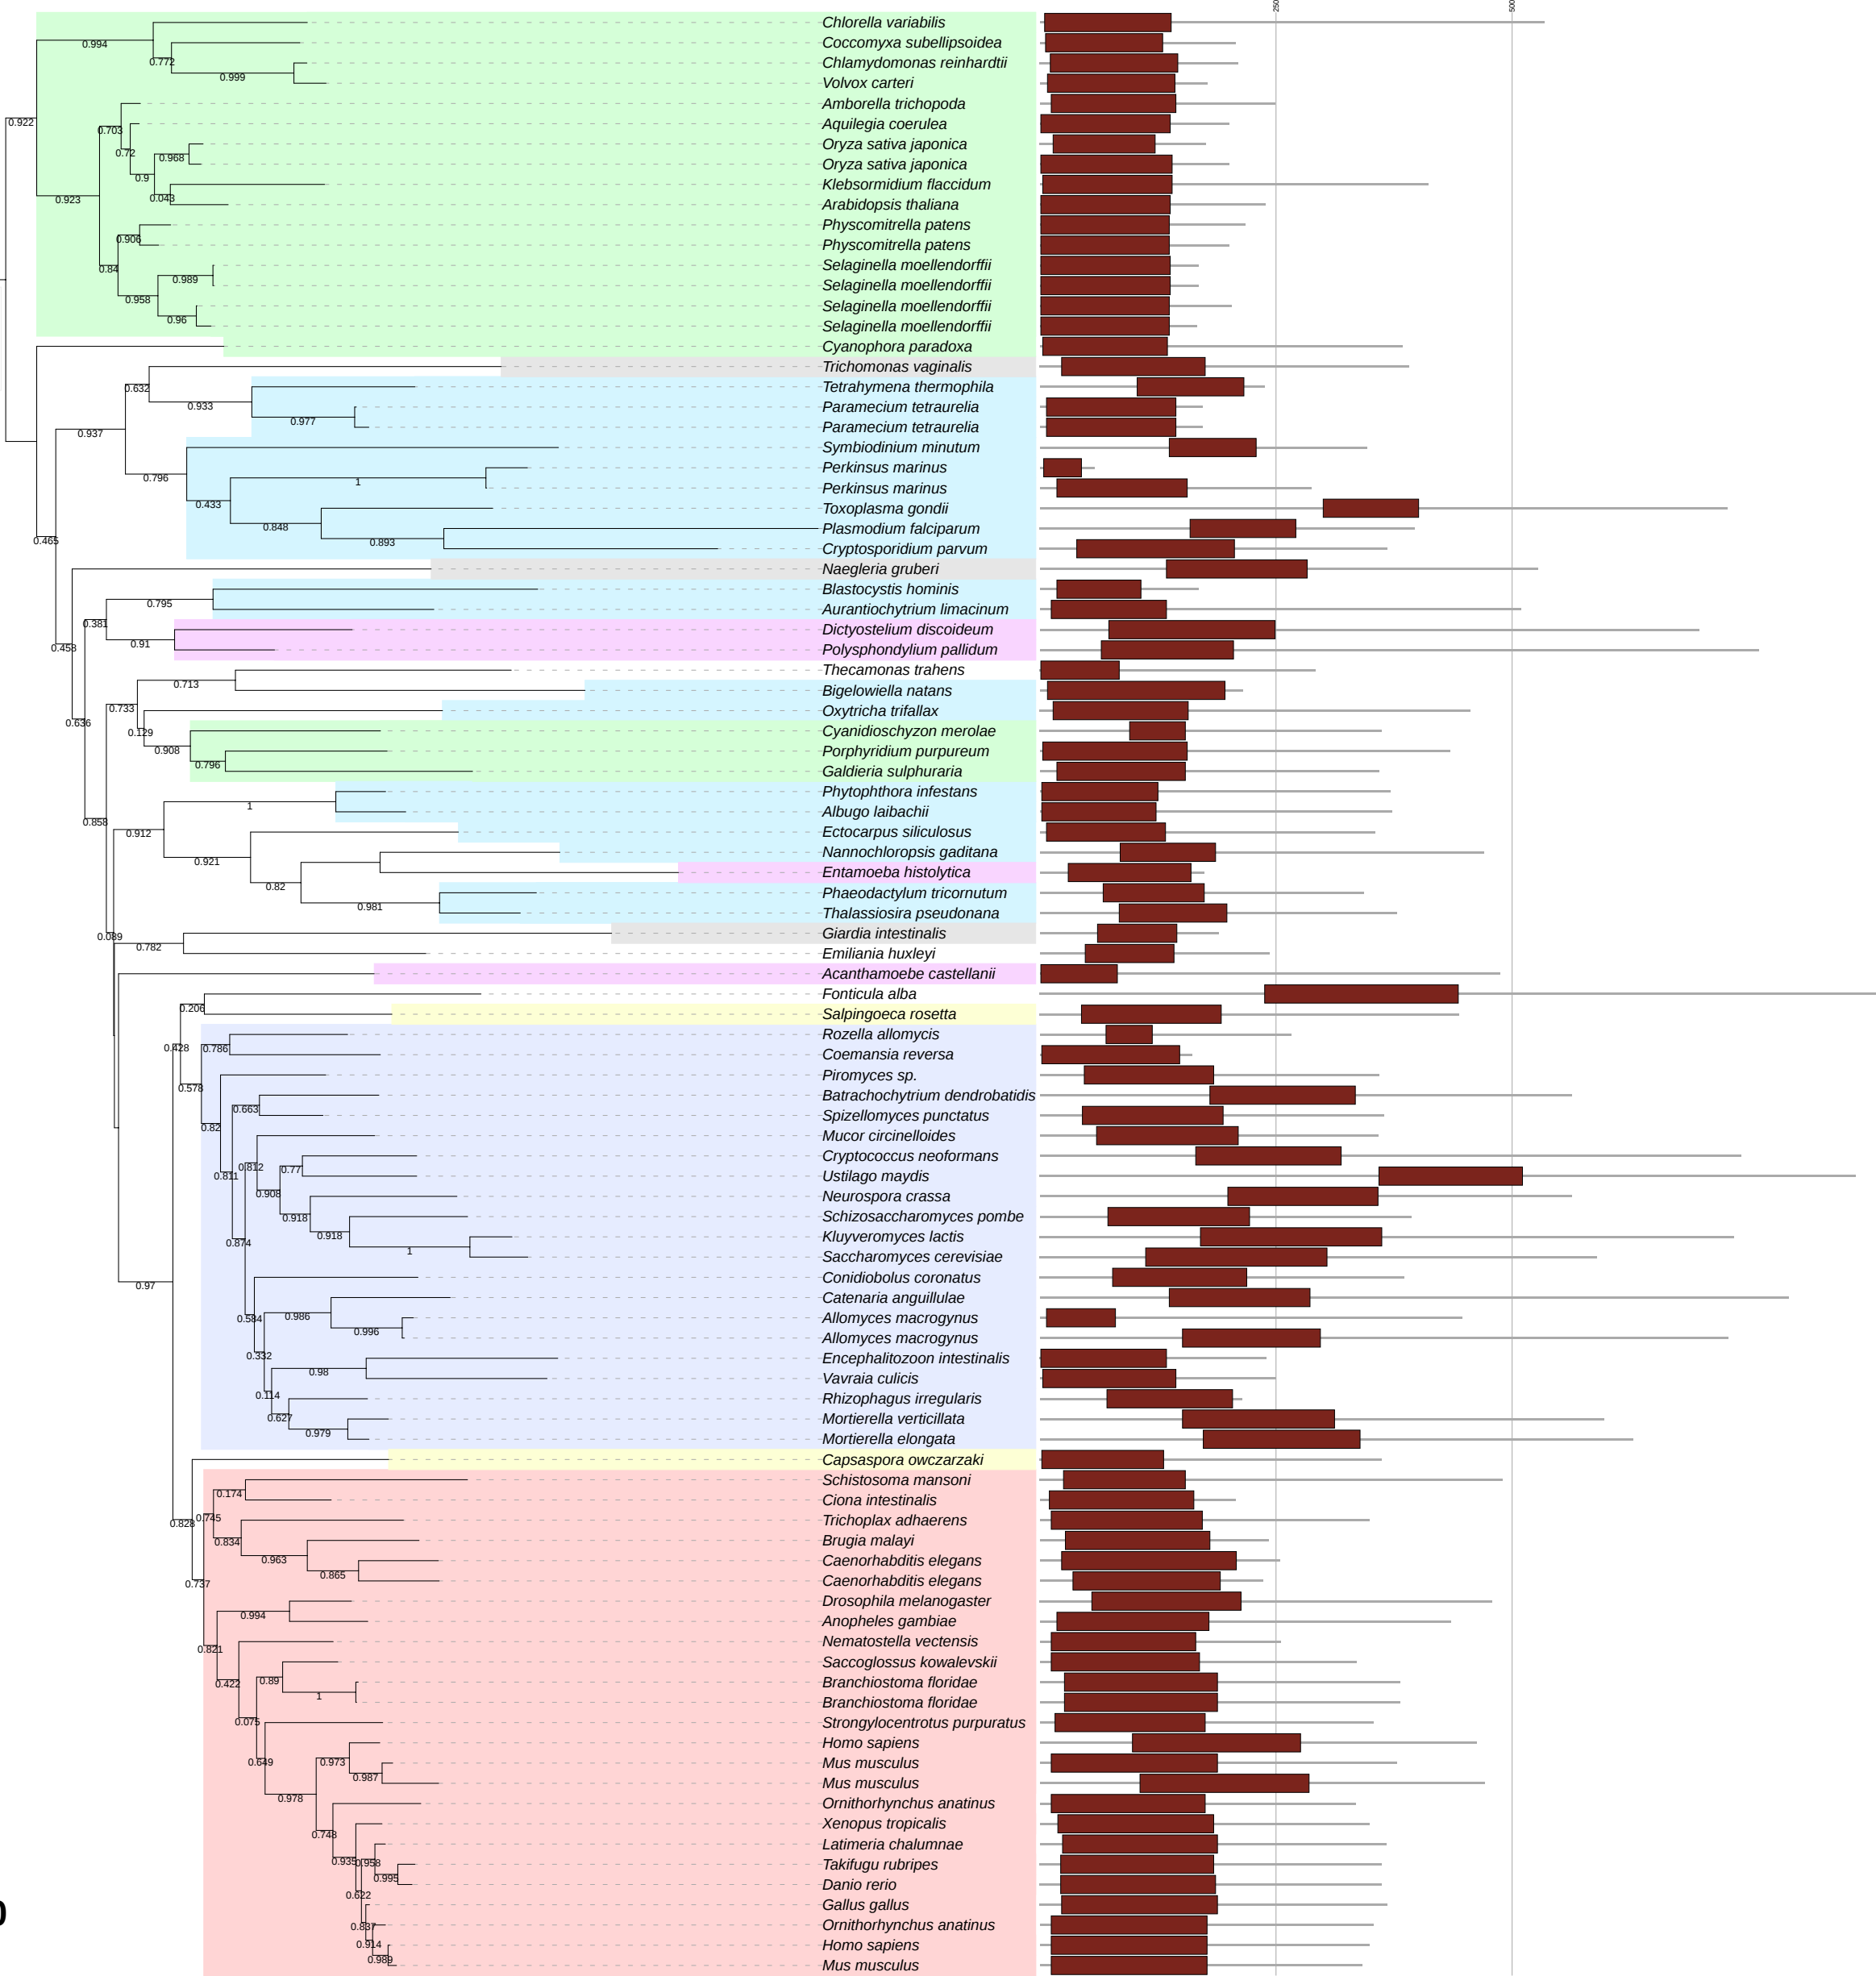

Supplemental Fig. S10



Tree scale: 1

**Domains**

- Histone fold
- NHR1 homology
- RCD1-SRO-TAF4 (RST)

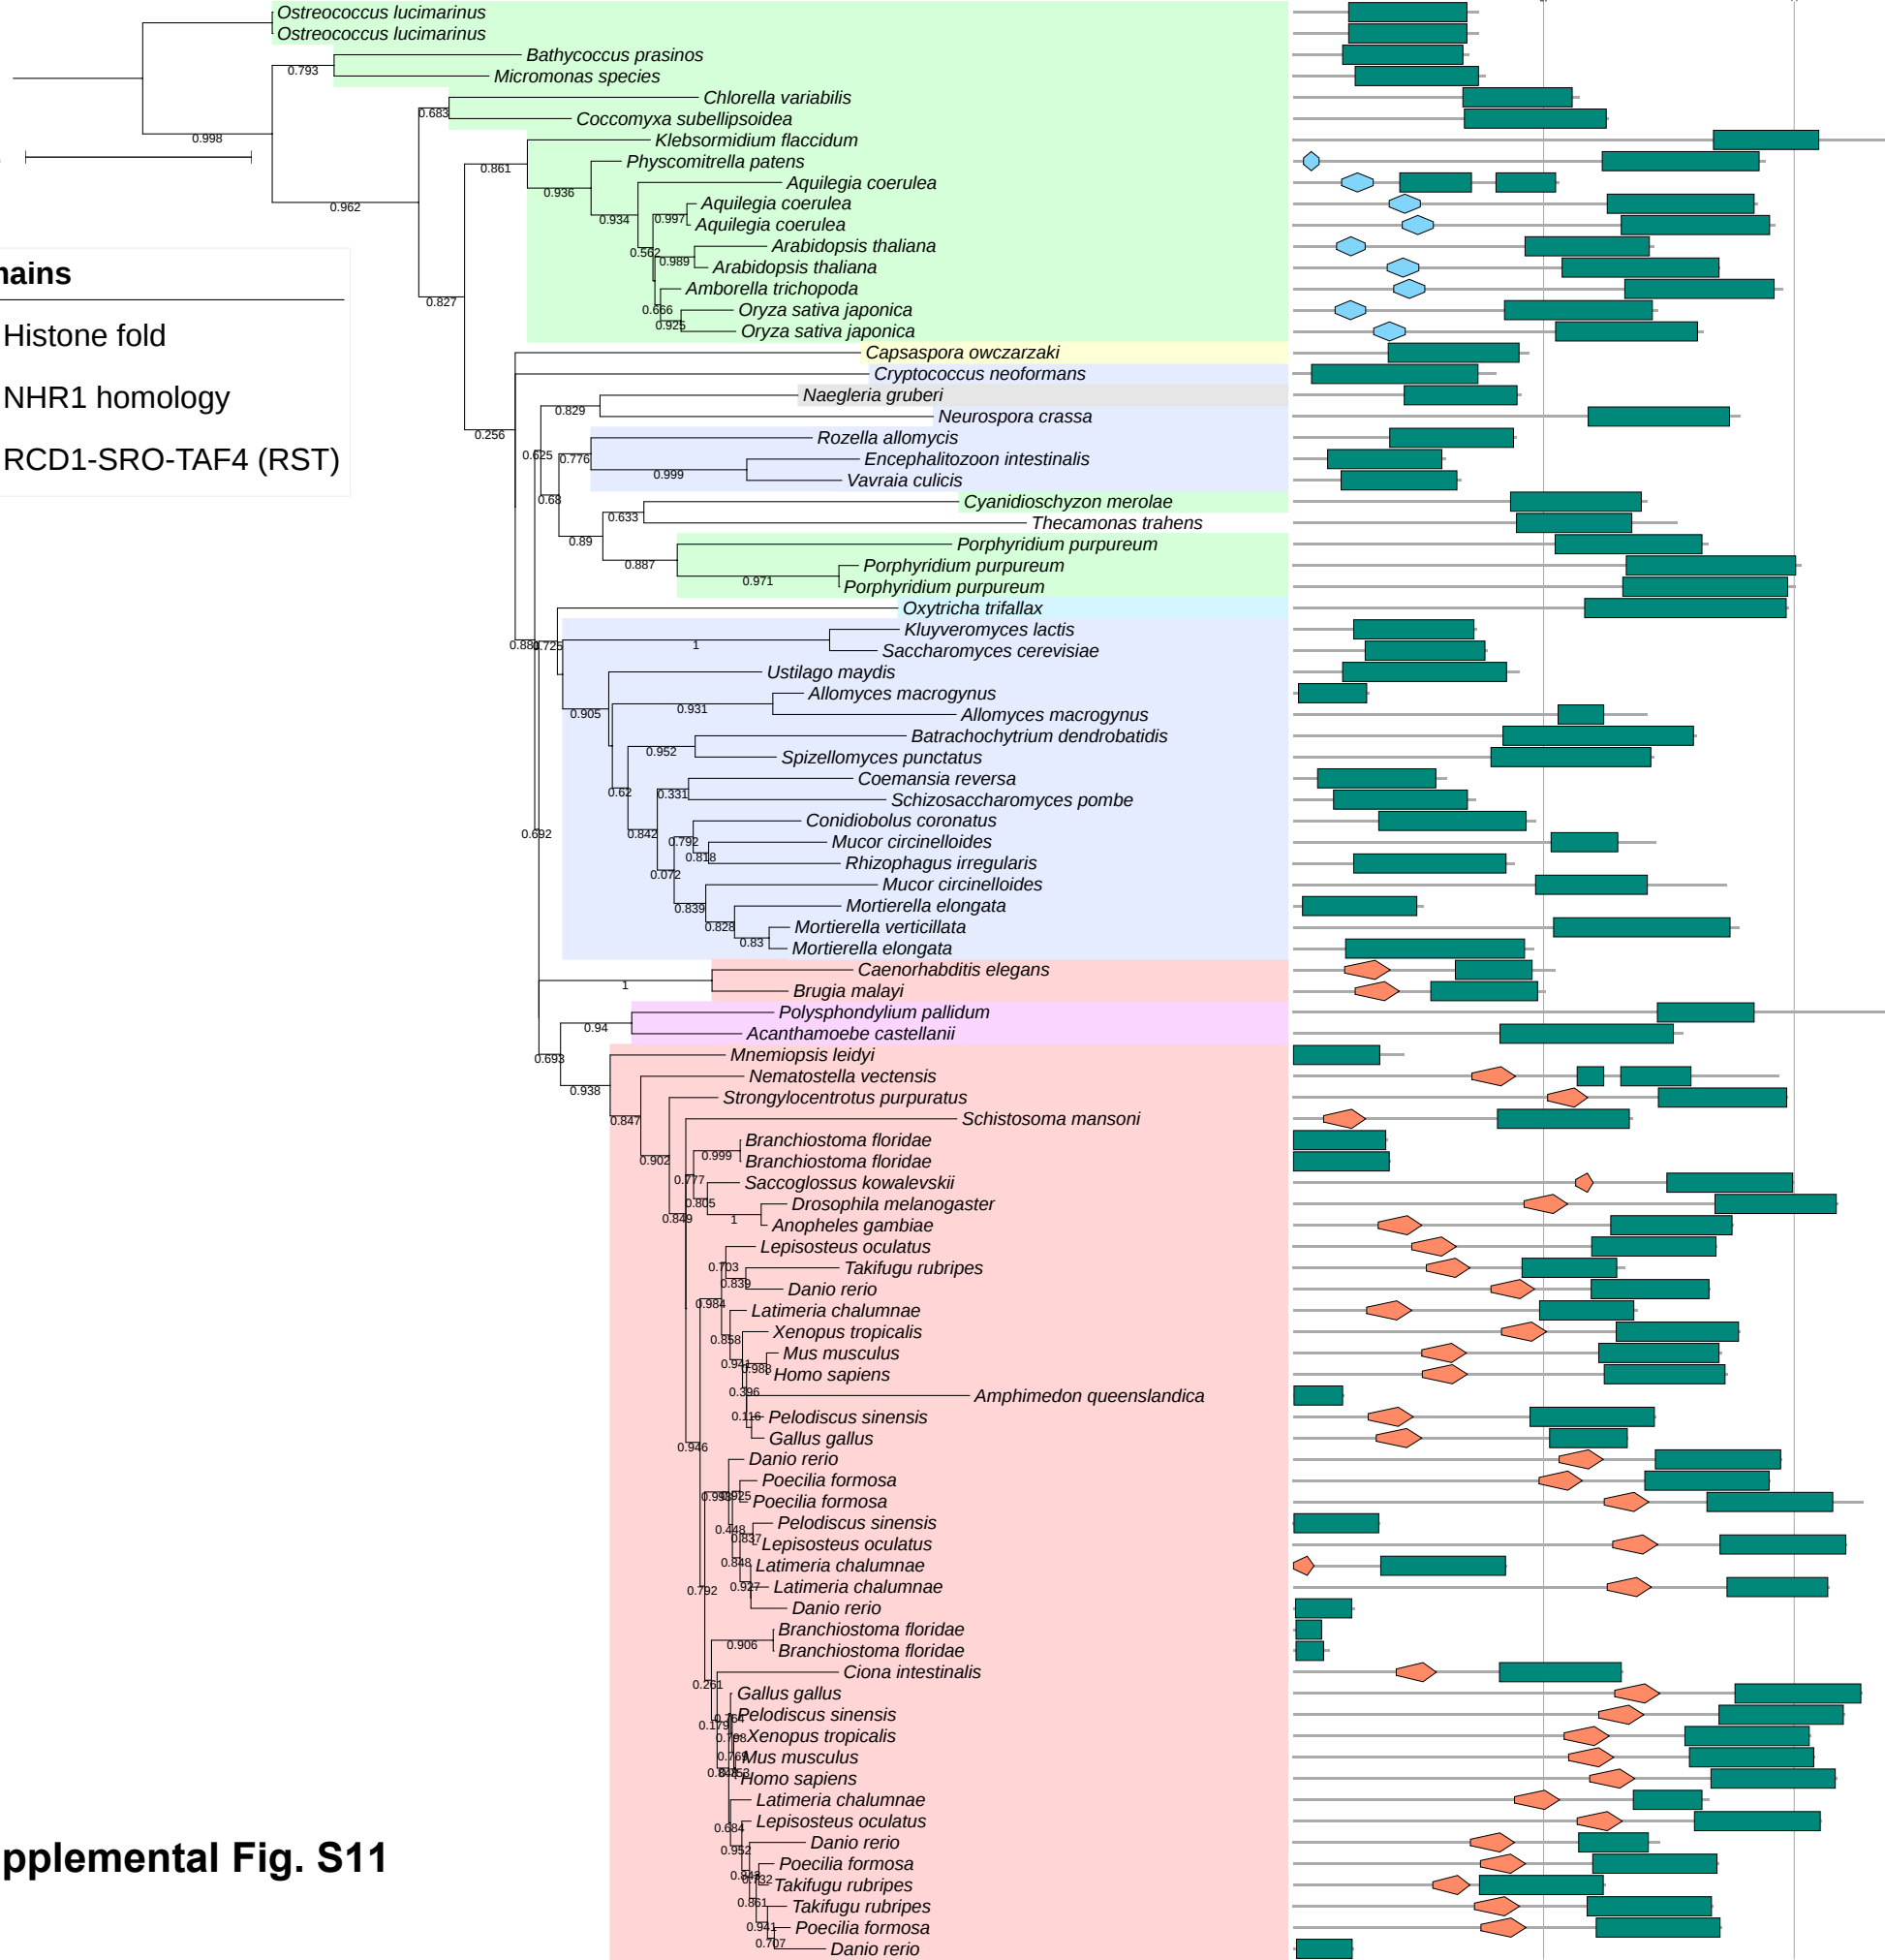

Supplemental Fig. S11

Tree scale: 1

Domains

Histone fold

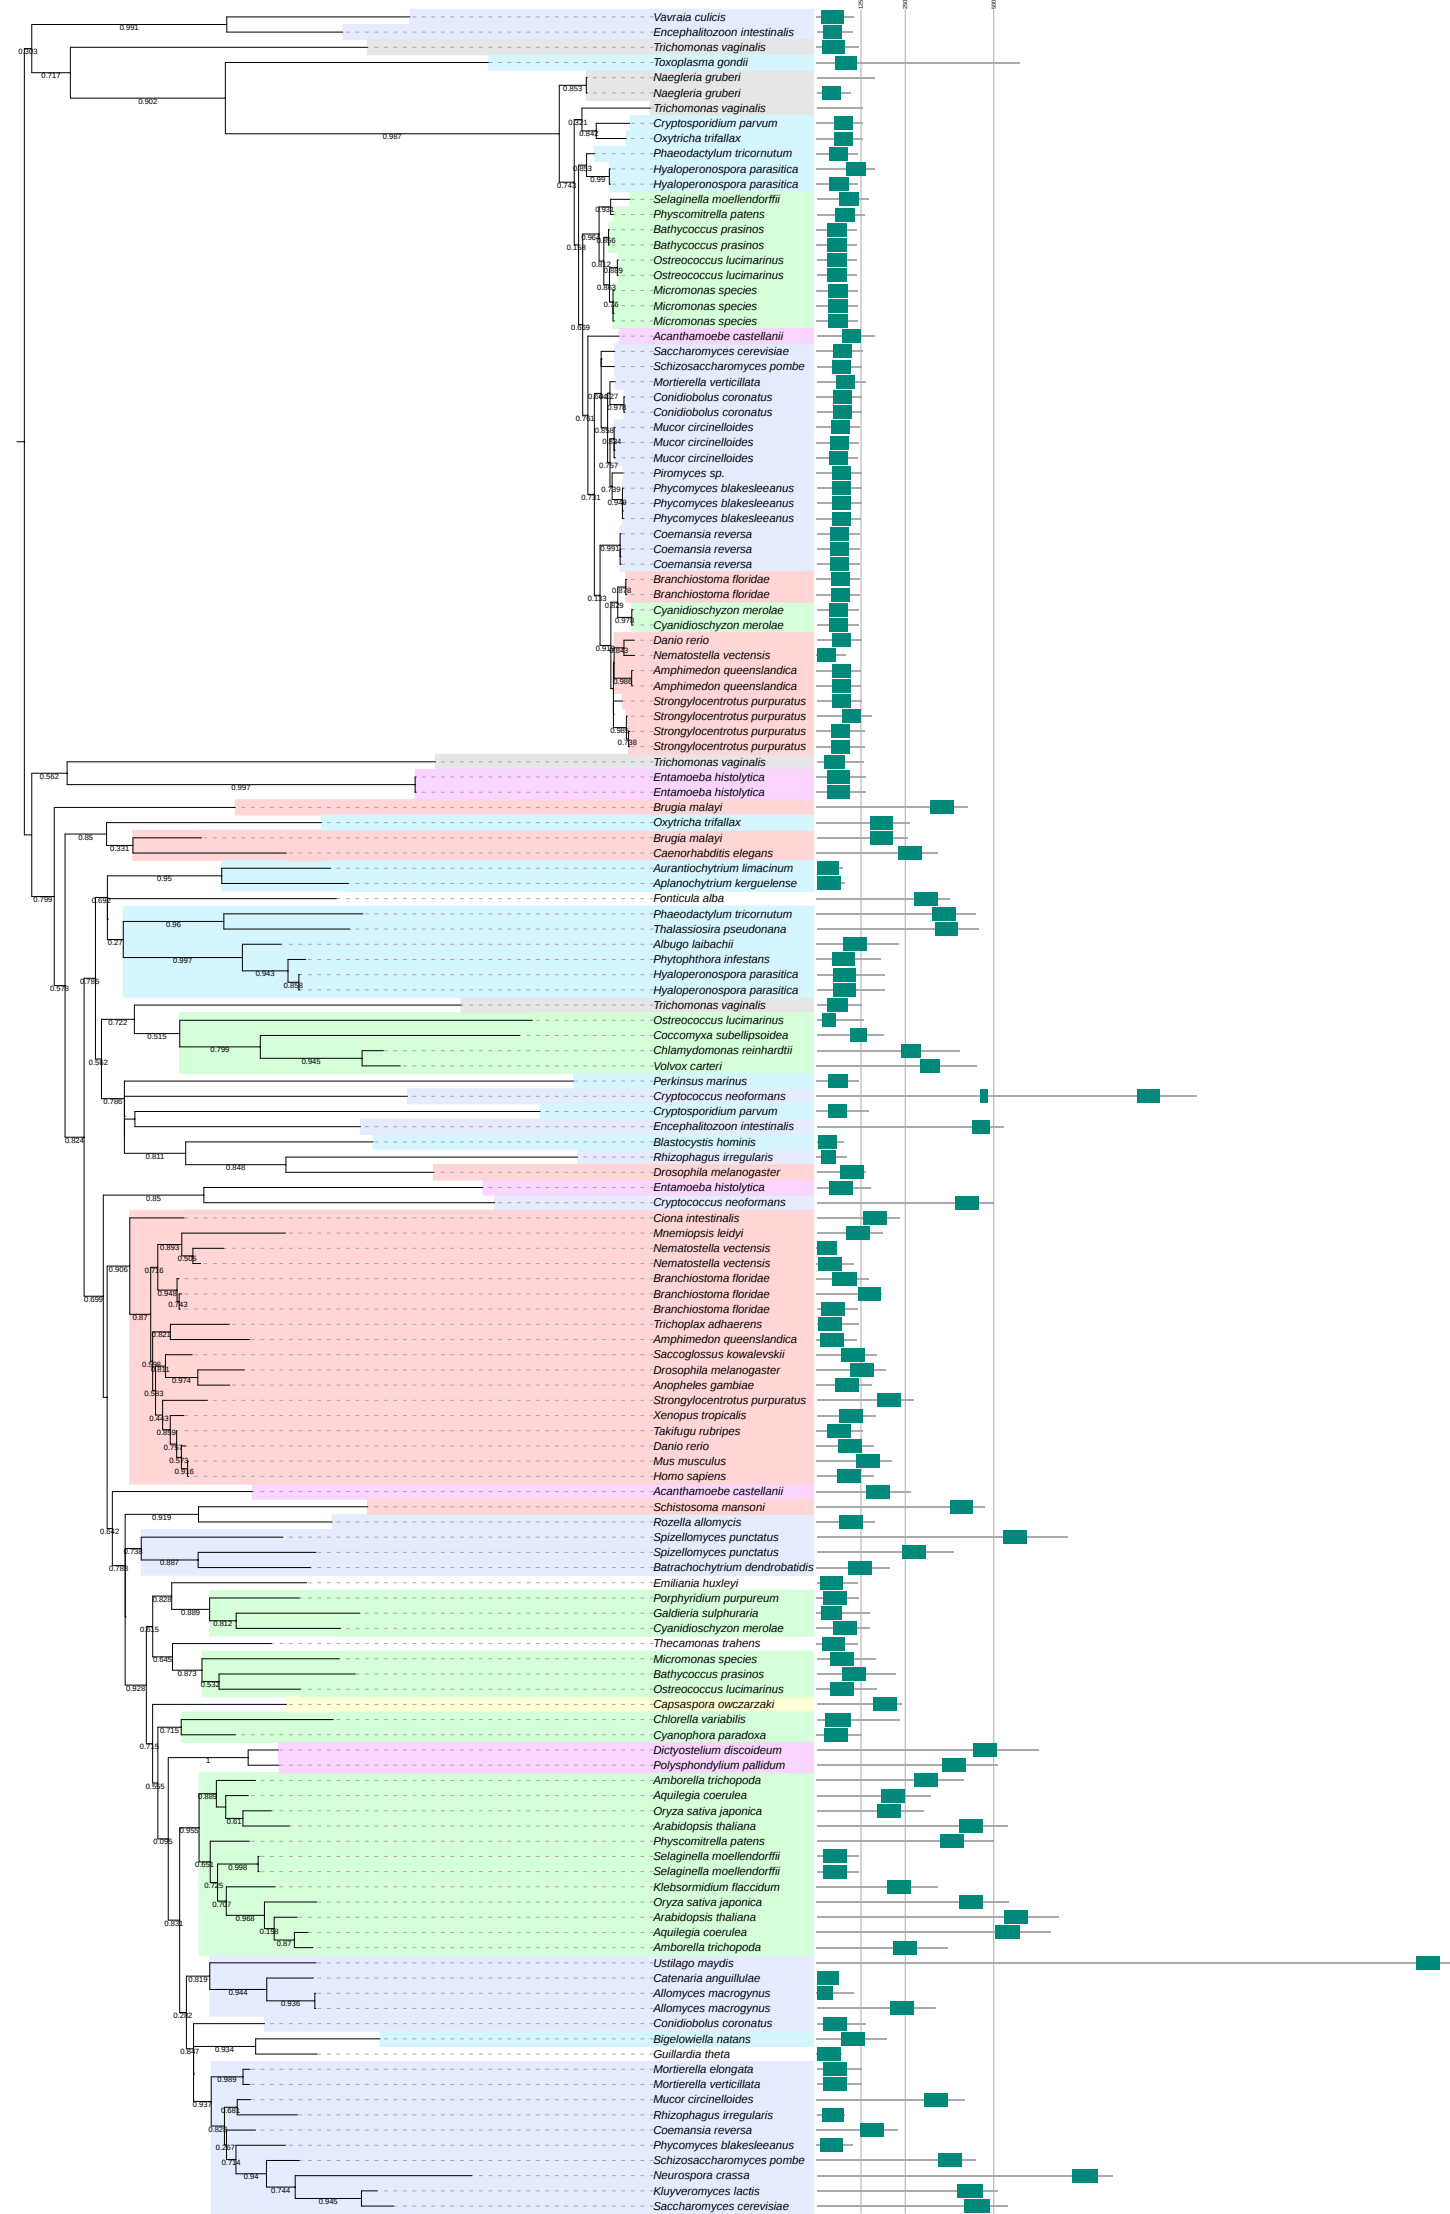

Supplemental Fig. S12

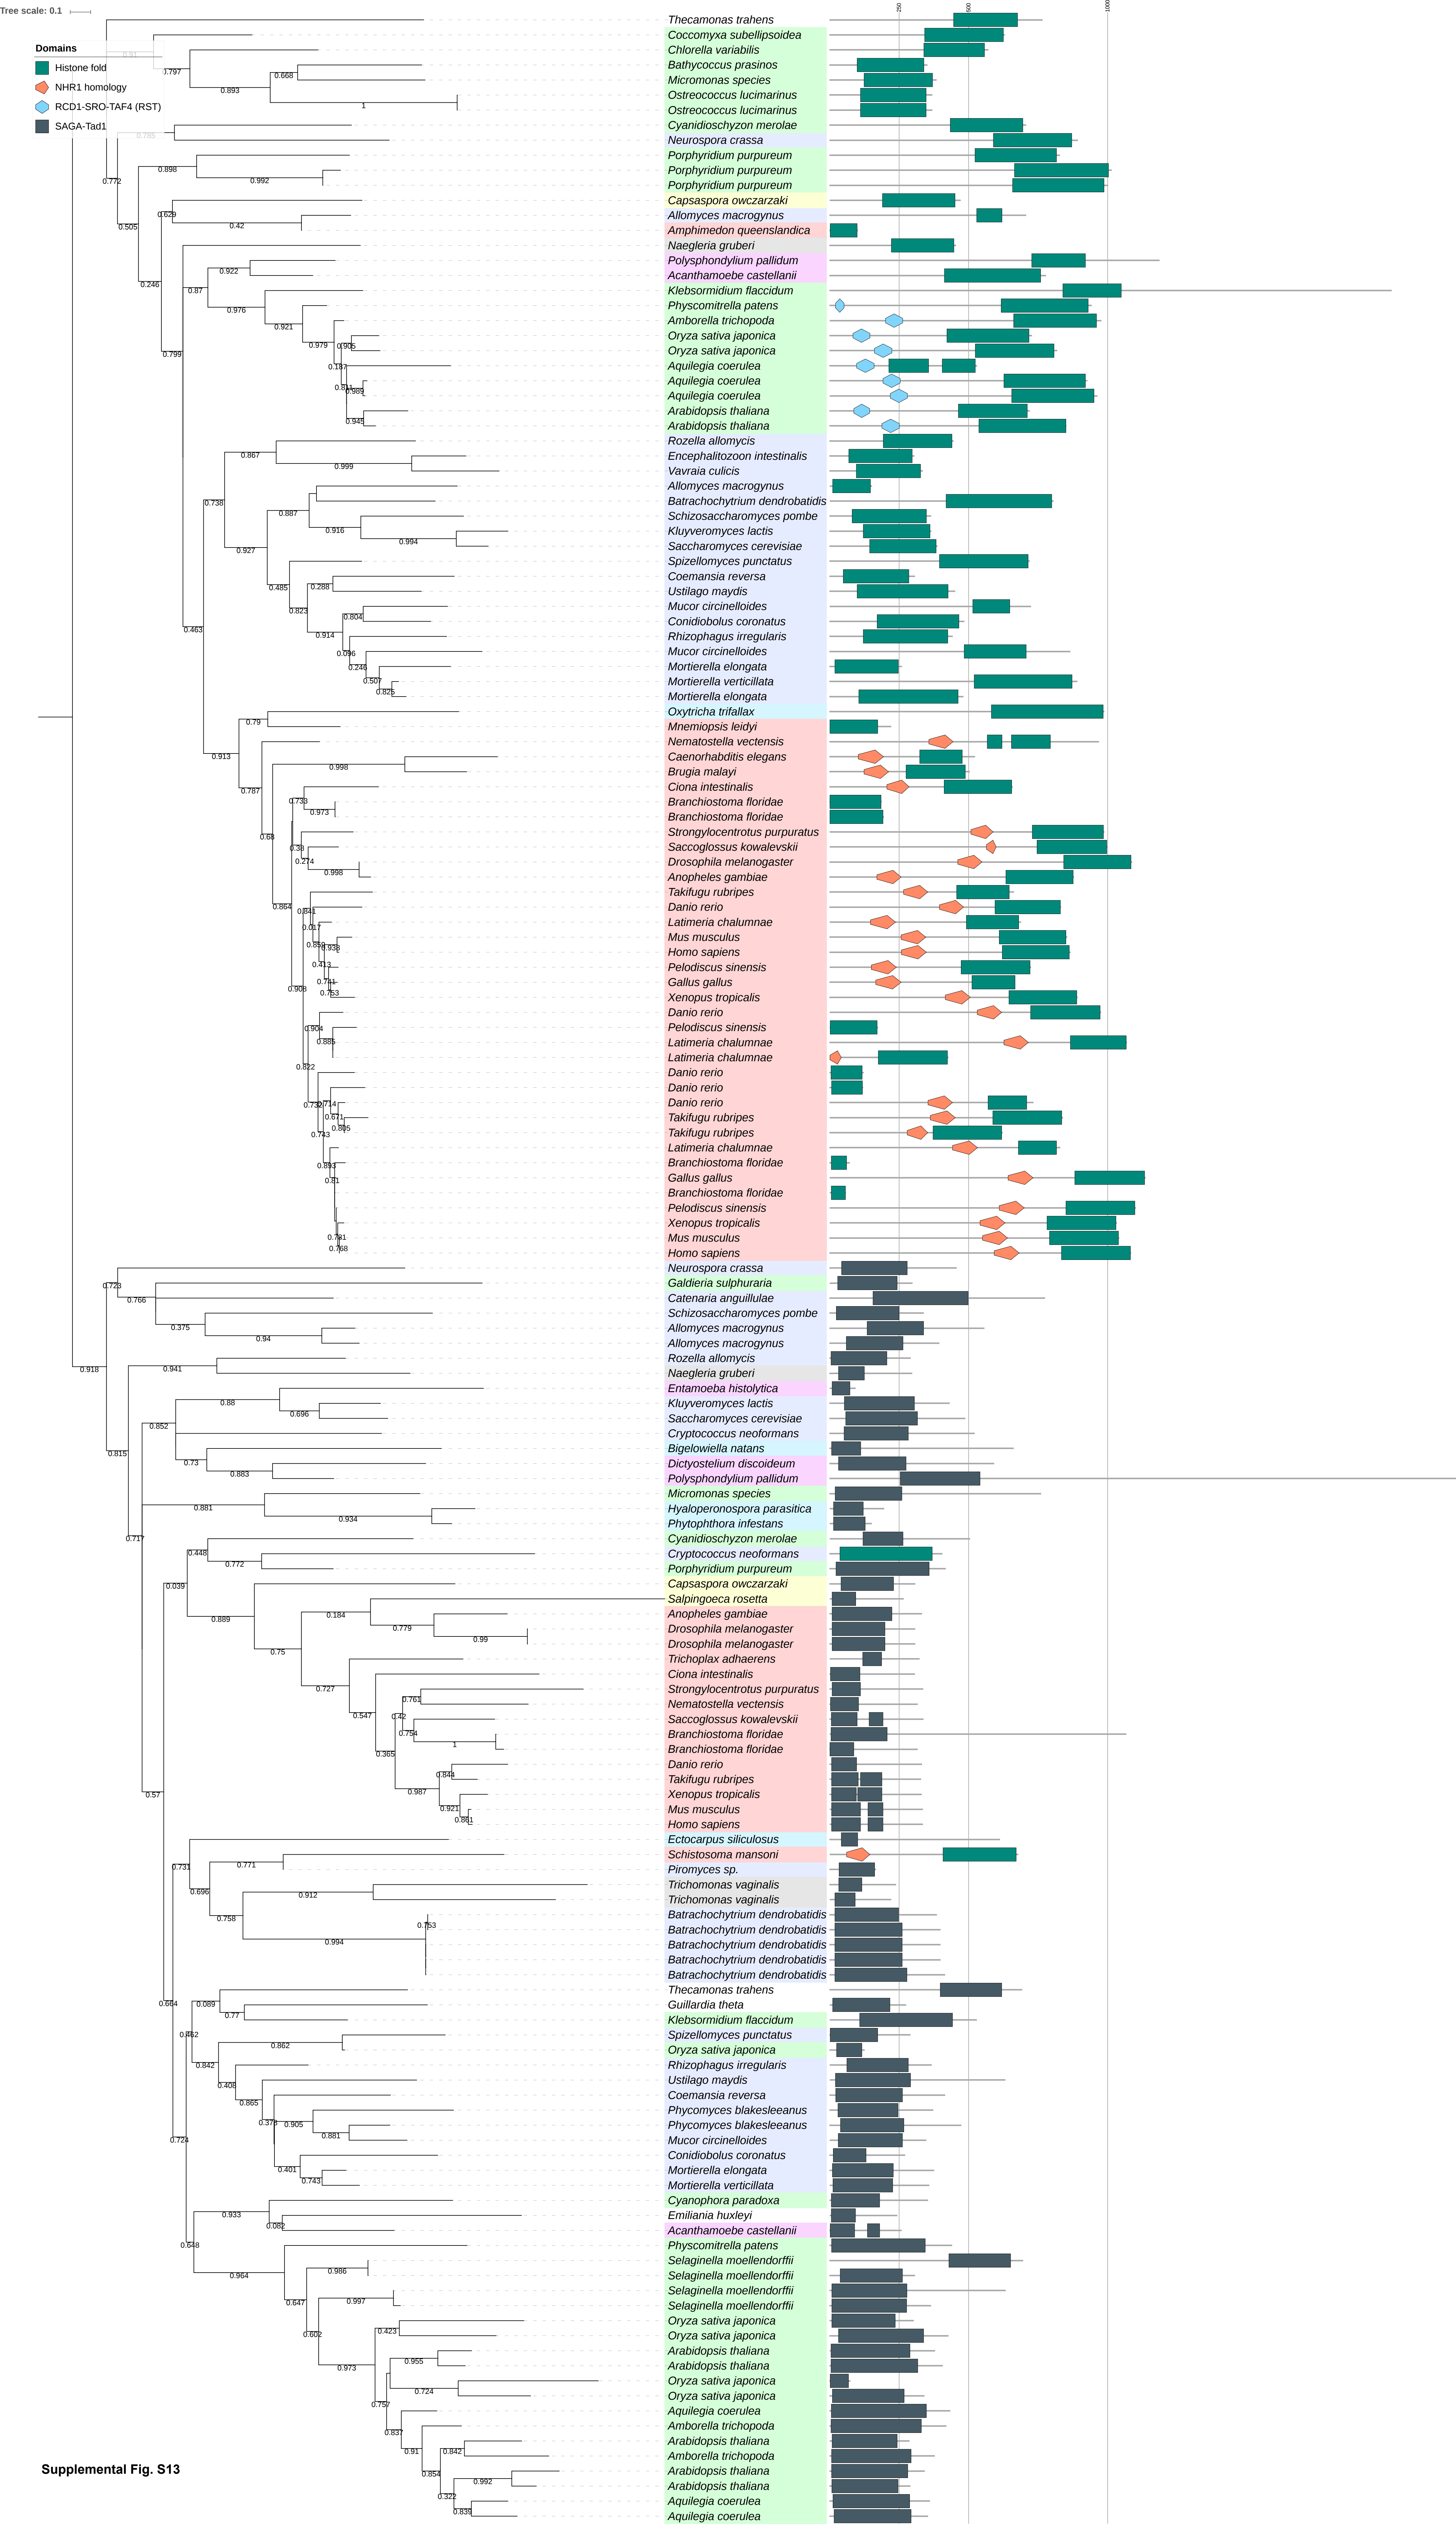

Supplemental Fig. S13

Tree scale: 1

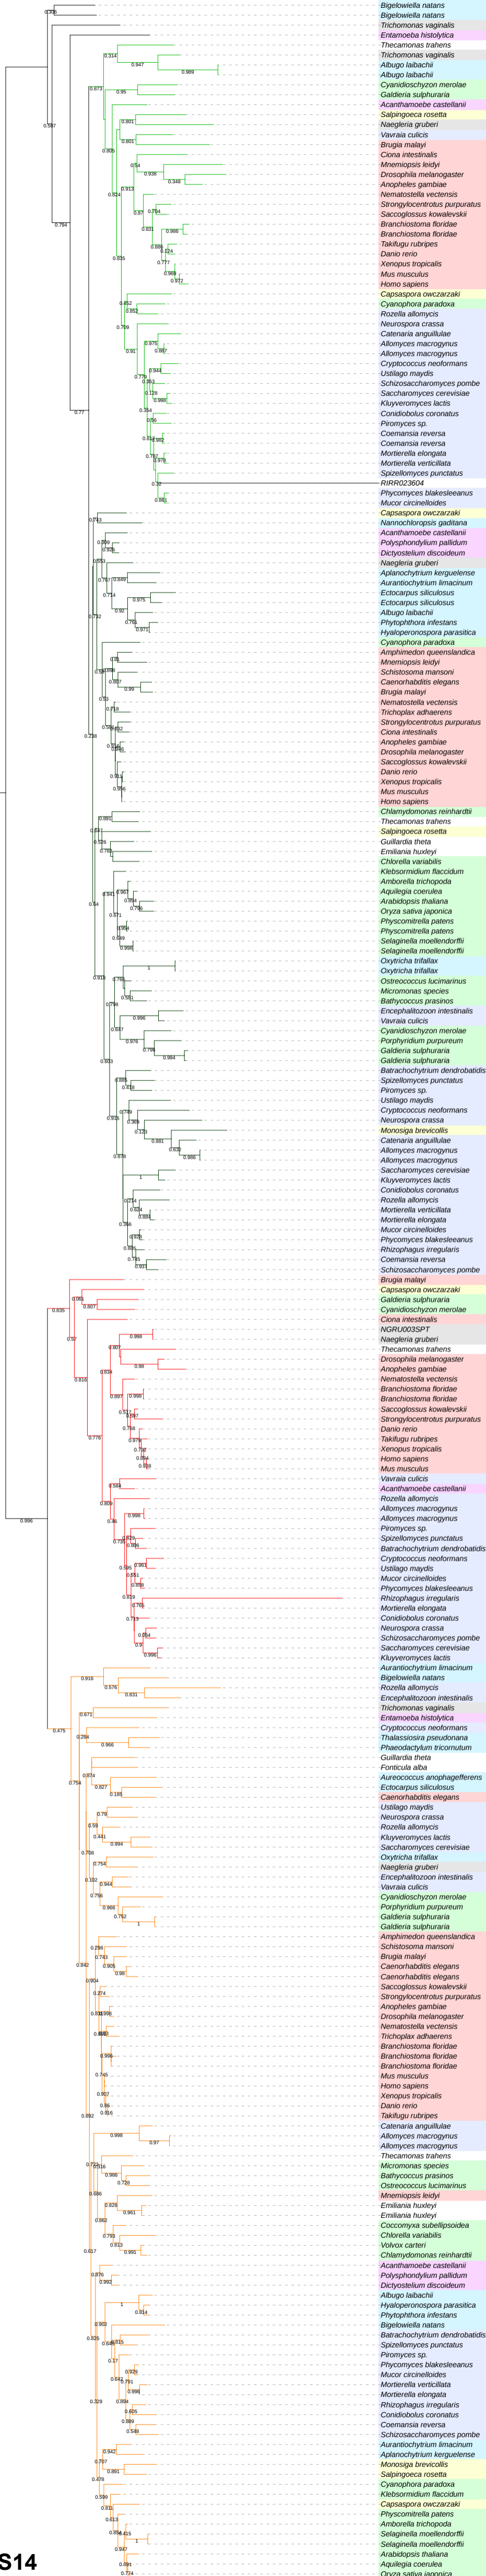

Supplemental Fig. S14
