# Supplementary figures and images for: Epigenetics and transcription regulation during eukaryotic diversification: the saga of TFIID
Source: PubMed Central journal article supplement — Genes Dev. 2019 Aug 1;33(15-16):888–902. doi: 10.1101/gad.300475.117 (PMC6672047; doi:10.1101/gad.300475.117), 2019-08-01

# Supplemental Fig. S15

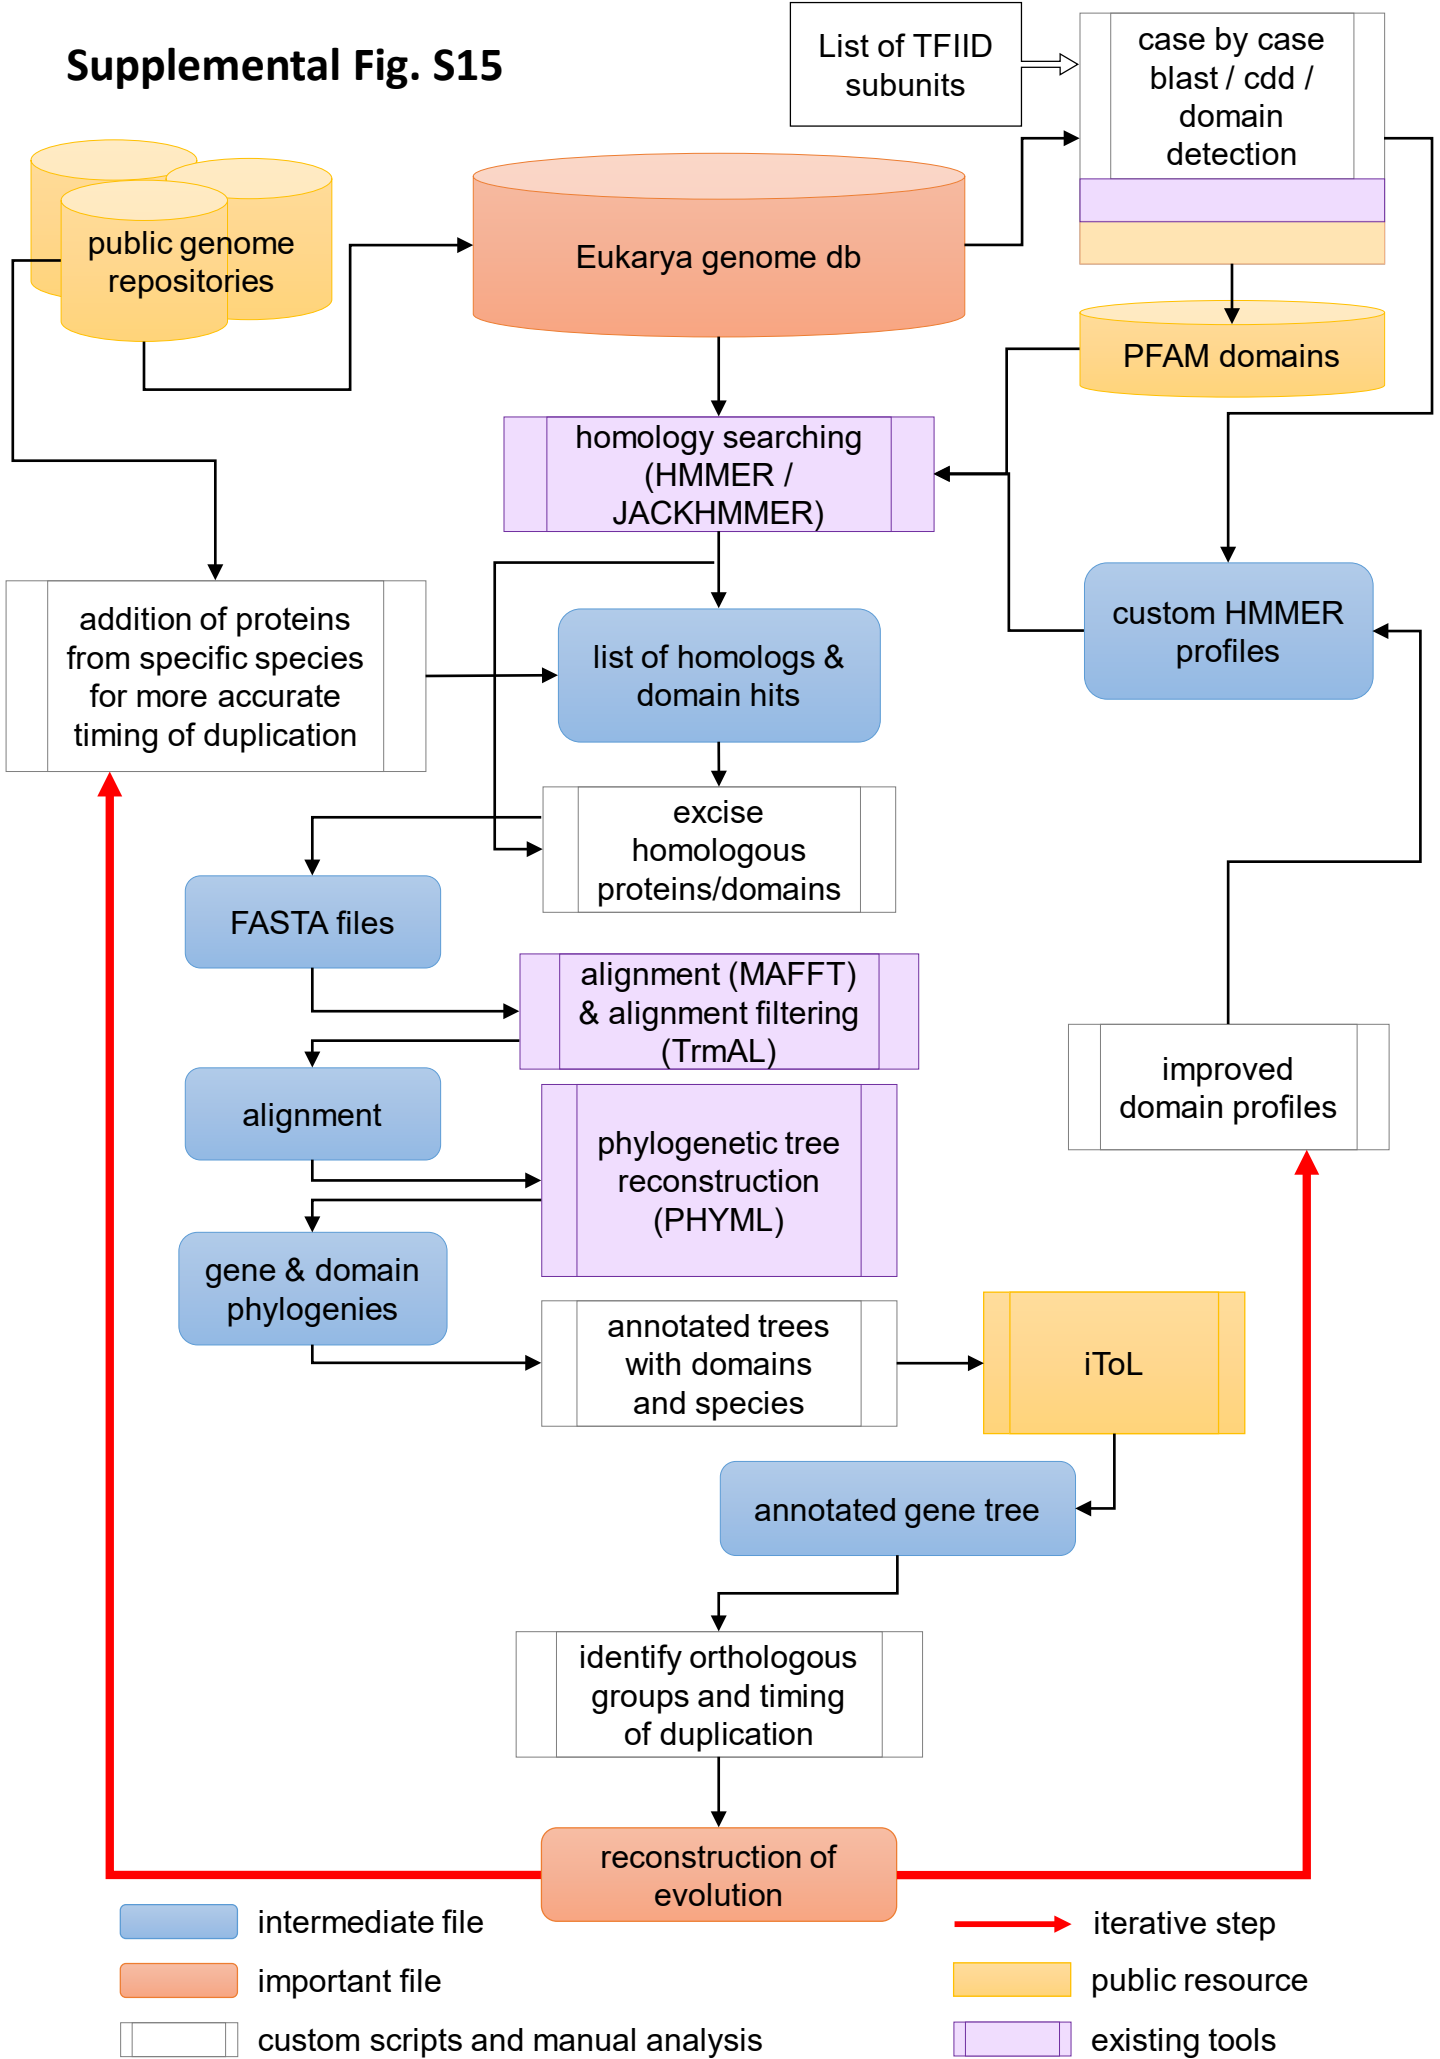

Supplement: supp_gad.300475.117_Supplemental_Fig_15_.pdf [file supp_gad.300475.117_Supplemental_Fig_15_.pdf]
